# Supplementary material for: New 2,4-bis[(substituted-aminomethyl)phenyl]phenylquinazoline and 2,4-bis[(substituted-aminomethyl)phenyl]phenylquinoline Derivatives: Synthesis and Biological Evaluation as Novel Anticancer Agents by Targeting G-Quadruplex
Source: MDPI journal article supplement (doi:10.3390/ph17010030), 2023-12-25
Supplement: s1 [file s1]

Supplementary Materials

# New 2,4-bis[(substituted-aminomethyl)phenyl]phenylquinazoline and 2,4-bis[(substituted-aminomethyl)phenyl]phenylquinoline Derivatives: Synthesis and Biological Evaluation as Novel Anticancer Agents by Targeting G-Quadruplex

Jean Guillon <sup>1</sup>, Marc Le Borgne <sup>2,\*</sup>, Vittoria Milano <sup>1</sup>, Aurore Guédin-Beaurepaire <sup>1</sup>, Stéphane Moreau <sup>1</sup>, Noël Pinaud <sup>3</sup>, Luisa Ronga <sup>4</sup>, Solène Savrimoutou <sup>1</sup>, Sandra Albenque-Rubio <sup>1</sup>, Mathieu Marchivie <sup>5</sup>, Haouraa Kalout <sup>1</sup>, Charley Walker <sup>1</sup>, Louise Chevallier <sup>1</sup>, Corinne Buré <sup>6</sup>, Eric Largy <sup>7</sup>, Valérie Gabelica <sup>7</sup>, Jean-Louis Mergny <sup>8</sup>, Virginie Baylot <sup>9</sup>, Jacky Ferrer <sup>10</sup>, Yamina Idrissi <sup>10</sup>, Edith Chevret <sup>10</sup>, David Cappellen <sup>10,11</sup>, Vanessa Desplat <sup>10</sup>, Zsuzsanna Schelz <sup>12</sup> and István Zupkó <sup>12,\*</sup>

- <sup>1</sup> INSERM, CNRS, ARNA, U1212, UMR 5320, UFR des Sciences Pharmaceutiques, Univ. Bordeaux, F-33076 Bordeaux, France; jean.guillon@u-bordeaux.fr (J.G.); vickymilano88@gmail.com (V.M.); aurore.guedin-beaurepaire@u-bordeaux.fr (A.G.-B.); stephane.moreau@u-bordeaux.fr (S.M.); solene.savrimoutou@u-bordeaux.fr (S.S.); sandra.rubio@u-bordeaux.fr (S.A.-R.); hkalout171996@gmail.com (H.K.); charley.walker@etu.u-bordeaux.fr (C.W.); chevallier.louise@yahoo.fr (L.C.)
  - <sup>2</sup> Small Molecules for Biological Targets Team, Centre de Recherche en Cancérologie de Lyon, Centre Léon Bérard, CNRS 5286, INSERM 1052, Université Claude Bernard Lyon 1, Univ. Lyon, F-69373 Lyon, France
  - <sup>3</sup> ISM—CNRS UMR 5255, Univ. Bordeaux, F-33405 Talence, France; noel.pinaud@u-bordeaux.fr (N.P.)
  - <sup>4</sup> E2S UPPA, CNRS, IPREM, Université de Pau et des Pays de l'Adour, F-64053 Pau, France; luisa.ronga@univ-pau.fr
  - <sup>5</sup> ICMCB—UMR 5026, Univ. Bordeaux, F-33608 Pessac, France; mathieu.marchivie@u-bordeaux.fr
  - <sup>6</sup> CNRS, INSERM, IECB, US1, UAR 3033, Univ. Bordeaux, F-33600 Pessac, France; corinne.bure@u-bordeaux.fr
  - <sup>7</sup> CNRS, INSERM, ARNA, UMR 5320, U1212, IECB, Univ. Bordeaux, F-33600 Pessac, France; eric.largy@u-bordeaux.fr (E.L.); valerie.gabelica@inserm.fr (V.G.)
  - <sup>8</sup> Ecole Polytechnique, Laboratoire d'Optique et Biosciences, CNRS, INSERM, Institut Polytechnique de Paris, F-91120 Palaiseau, France; jean-louis.mergny@inserm.fr
  - <sup>9</sup> Centre de Recherche en Cancérologie de Marseille (CRCM), Institut Paoli-Calmettes, CNRS UMR7258, Inserm U1068, Univ. Aix Marseille, F-13009 Marseille, France; virginie.baylot@inserm.fr
  - <sup>10</sup> INSERM UMR1312, BRIC, BoRdeaux Institute of onCology, Univ. Bordeaux, F-33076 Bordeaux, France; jacky\_ferrer@yahoo.fr (J.F.); yamina.idrissi@u-bordeaux.fr (Y.I.); edith.chevret@u-bordeaux.fr (E.C.); david.cappellen@u-bordeaux.fr (D.C.); vanessa.desplat@u-bordeaux.fr (V.D.)
  - <sup>11</sup> Service Tumor Biology and Tumor Bank Laboratory, Groupe Hospitalier Bordeaux, CHU Bordeaux, F-33000 Bordeaux, France
  - <sup>12</sup> Institute of Pharmacodynamics and Biopharmacy, Faculty of Pharmacy, University of Szeged, 6720 Szeged, Hungary; schelz.zsuzsanna@szte.hu
- \* Correspondence: marc.le-borgne@univ-lyon1.fr (M.L.B.); zupko.istvan@szte.hu (I.Z.)

**Table S1.** Physical properties of amines **12a-n** and **13a-e**.

| Compound  | Crystal color | Salt <sup>a</sup>     | mp (°C) <sup>b</sup> | Yield (%) <sup>c</sup> |
|-----------|---------------|-----------------------|----------------------|------------------------|
| <b>2a</b> | Yellow        | 4 (COOH) <sub>2</sub> | 147-149              | 67                     |
| <b>2b</b> | Yellow        | 4 (COOH) <sub>2</sub> | 234-236              | 71                     |
| <b>2c</b> | Yellow        | 4 (COOH) <sub>2</sub> | 152-155              | 63                     |
| <b>2d</b> | Pale-yellow   | 6 (COOH) <sub>2</sub> | 226-228              | 67                     |
| <b>2e</b> | White         | 6 (COOH) <sub>2</sub> | 165-167              | 50                     |
| <b>2f</b> | White         | 4 (COOH) <sub>2</sub> | 223-225              | 74                     |
| <b>2g</b> | Pale-yellow   | 4 (COOH) <sub>2</sub> | 145-147              | 66                     |
| <b>2h</b> | Pale-yellow   | 4 (COOH) <sub>2</sub> | 144-146              | 65                     |
| <b>2i</b> | Pale-yellow   | 6 (COOH) <sub>2</sub> | 221-223              | 60                     |
| <b>2j</b> | Pale-yellow   | 6 (COOH) <sub>2</sub> | 187-189              | 55                     |
| <b>2k</b> | White         | 4 (COOH) <sub>2</sub> | 211-213              | 81                     |
| <b>2l</b> | Pale-yellow   | 4 (COOH) <sub>2</sub> | 186-188              | 73                     |
| <b>2m</b> | White         | 6 (COOH) <sub>2</sub> | 224-226              | 52                     |
| <b>2n</b> | White         | 6 (COOH) <sub>2</sub> | 177-179              | 58                     |
| <b>3a</b> | Yellow        | 4 (COOH) <sub>2</sub> | 192-194              | 63                     |
| <b>3b</b> | Yellow        | 4 (COOH) <sub>2</sub> | 140-142              | 62                     |
| <b>3c</b> | Pale-yellow   | 6 (COOH) <sub>2</sub> | 219-221              | 84                     |
| <b>3d</b> | Yellow        | 6 (COOH) <sub>2</sub> | 165-167              | 51                     |
| <b>3e</b> | Pale-yellow   | 4 (COOH) <sub>2</sub> | 174-176              | 57                     |

<sup>a</sup>The stoichiometry and composition of the salts were determined by elemental analyses and obtained values were within  $\pm 0.4\%$  of the theoretical values. <sup>b</sup>Crystallization solvent: 2-PrOH-H<sub>2</sub>O. <sup>c</sup>The yields only included the conversions into the ammonium oxalates.

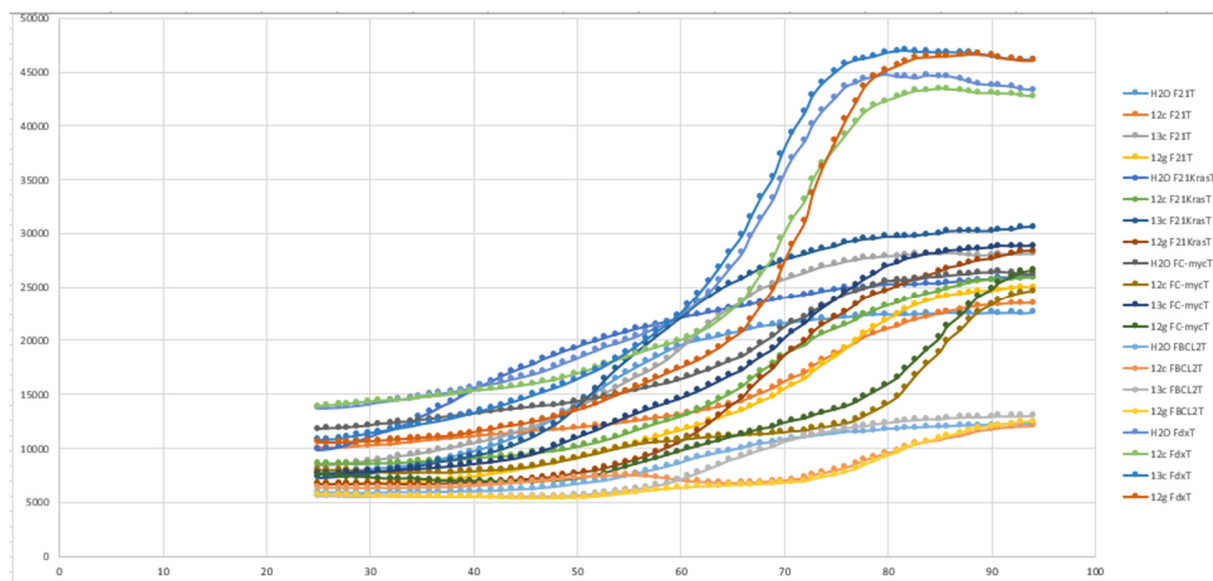

**Figure S1.** FRET-melting curves of compounds **12c**, **12g** and **13c**.

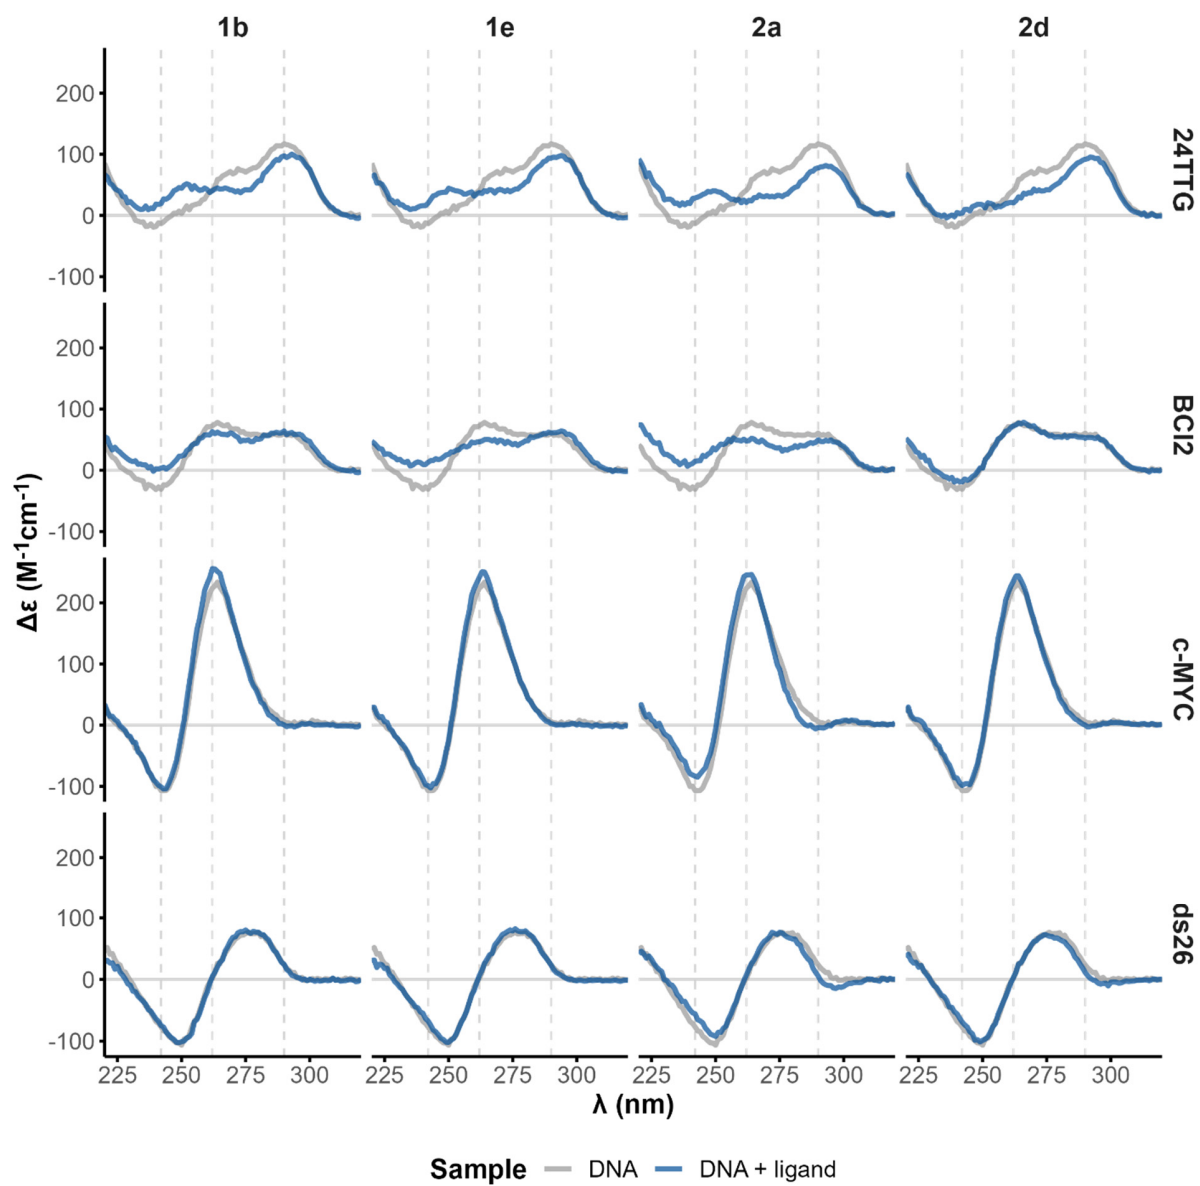

**Figure S2.** Circular dichroism spectra of solutions containing **12b**, **12e**, **13a** or **13d** (20  $\mu\text{M}$ ) with 24TTG, BCL-2 or c-MYC (10  $\mu\text{M}$ ) in 100 mM ammonium acetate (pH = 6.8) (DNA + ligand; blue) compared to a reference with DNA alone (grey). The positions of characteristic bands at around 240, 260, and 290 nm are shown with dashed grey lines.

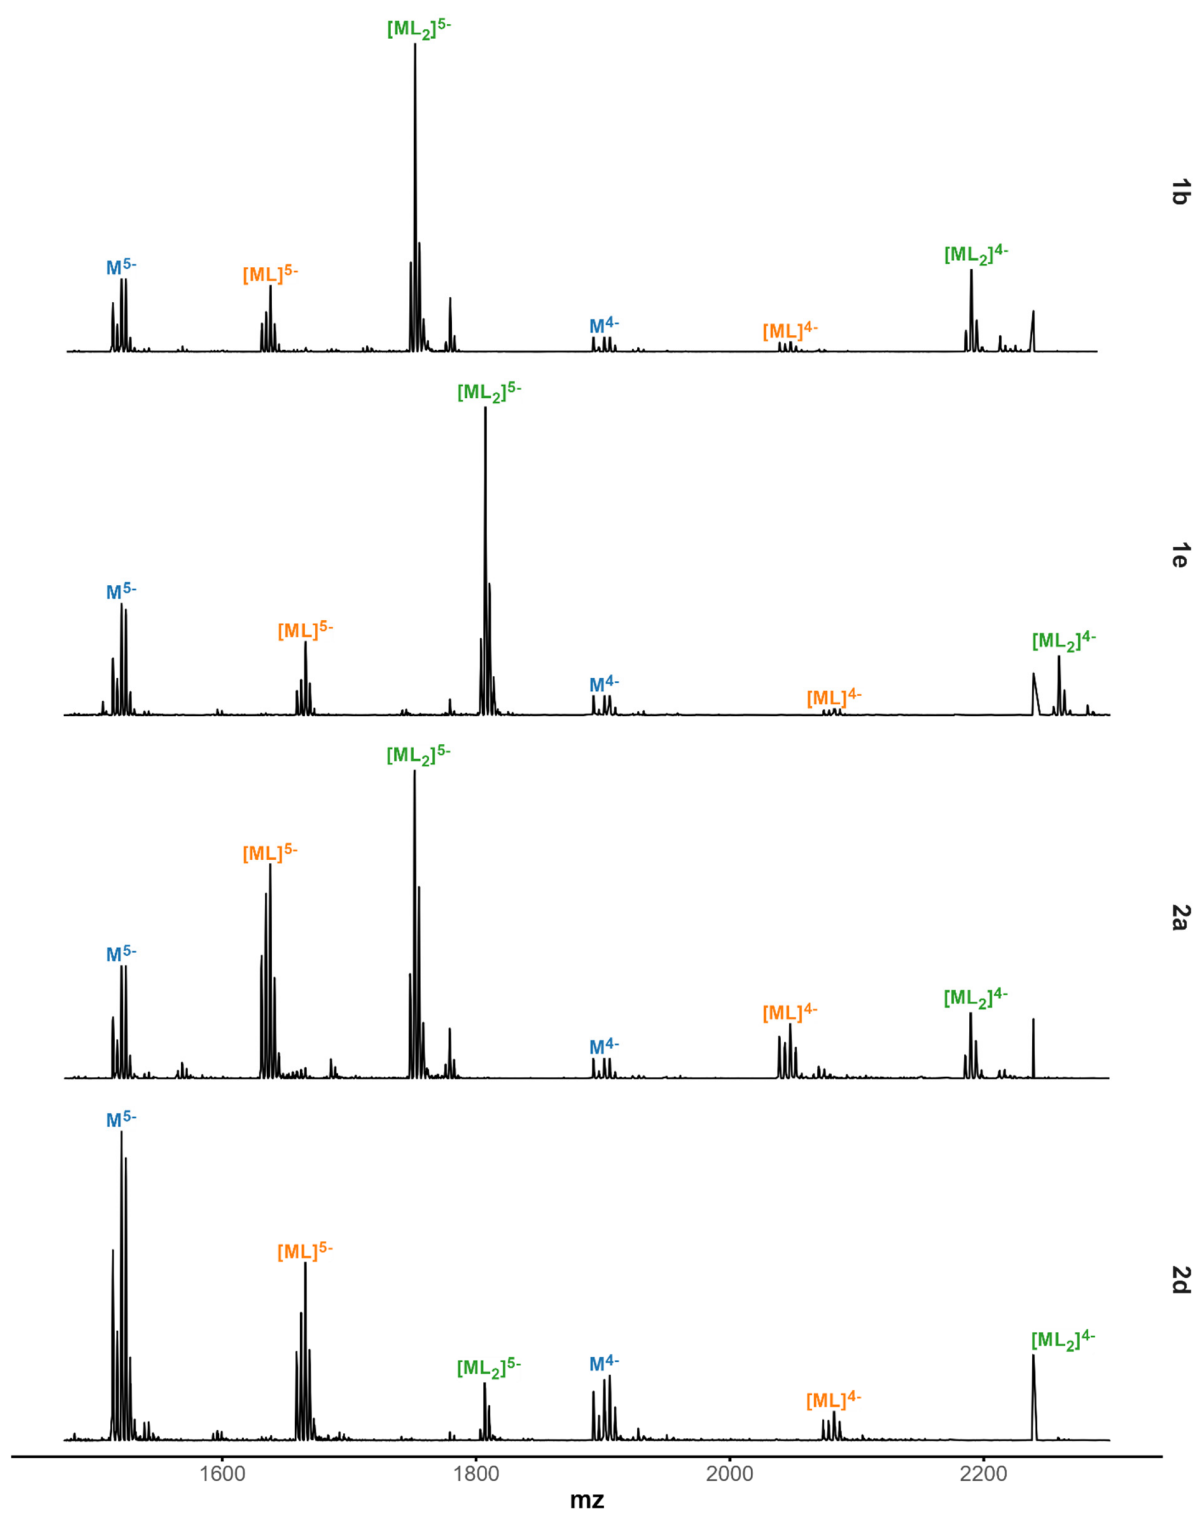

**Figure S3.** Native electrospray mass spectra of solutions containing **12b**, **12e**, **13a** or **13d** (20  $\mu$ M) with 24TTG (10  $\mu$ M) in 100 mM ammonium acetate (pH = 6.8), zoomed on the 4- and 5- charge states: M = oligonucleotide monomer, L = ligand.

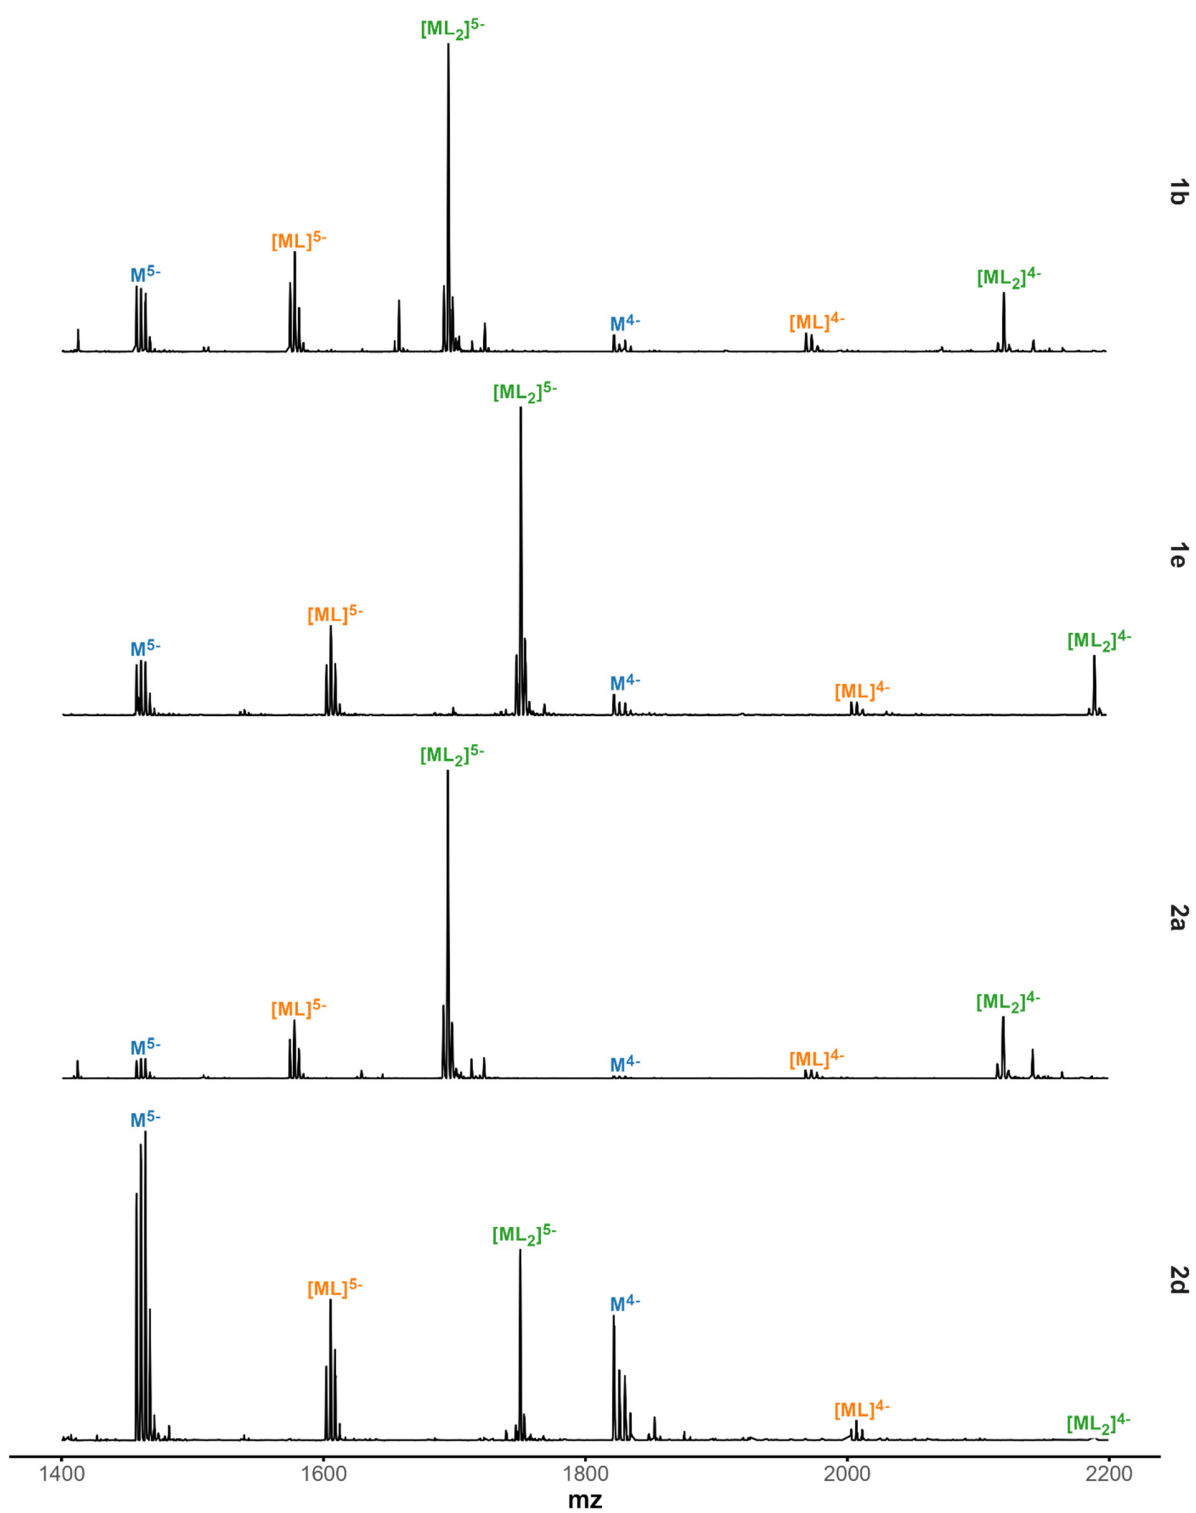

**Figure S4.** Native electrospray mass spectra of solutions containing **12b**, **12e**, **13a** or **13d** (20  $\mu$ M) with BCL-2 (10  $\mu$ M) in 100 mM ammonium acetate (pH = 6.8), zoomed on the 4- and 5- charge states: M = oligonucleotide monomer, L = ligand.

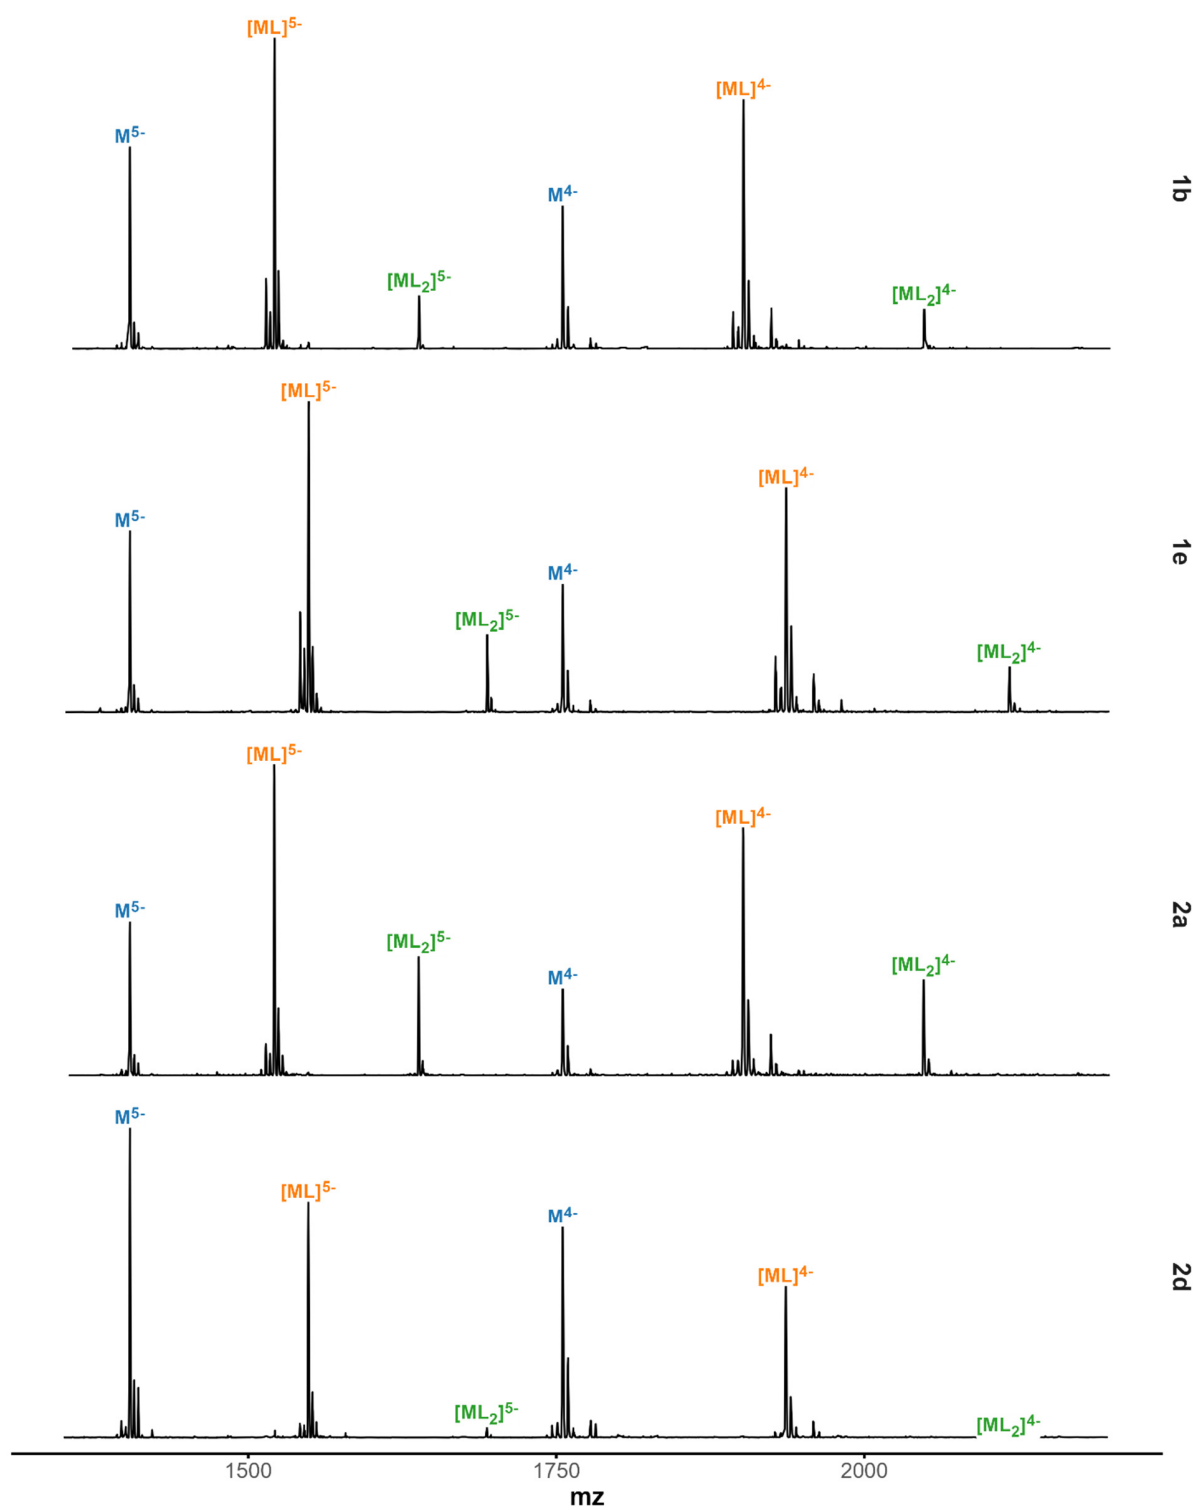

**Figure S5.** Native electrospray mass spectra of solutions containing **12b**, **12e**, **13a** or **13d** (20  $\mu$ M) with c-MYC (10  $\mu$ M) in 100 mM ammonium acetate (pH = 6.8), zoomed on the 4- and 5- charge states: M = oligonucleotide monomer, L = ligand.

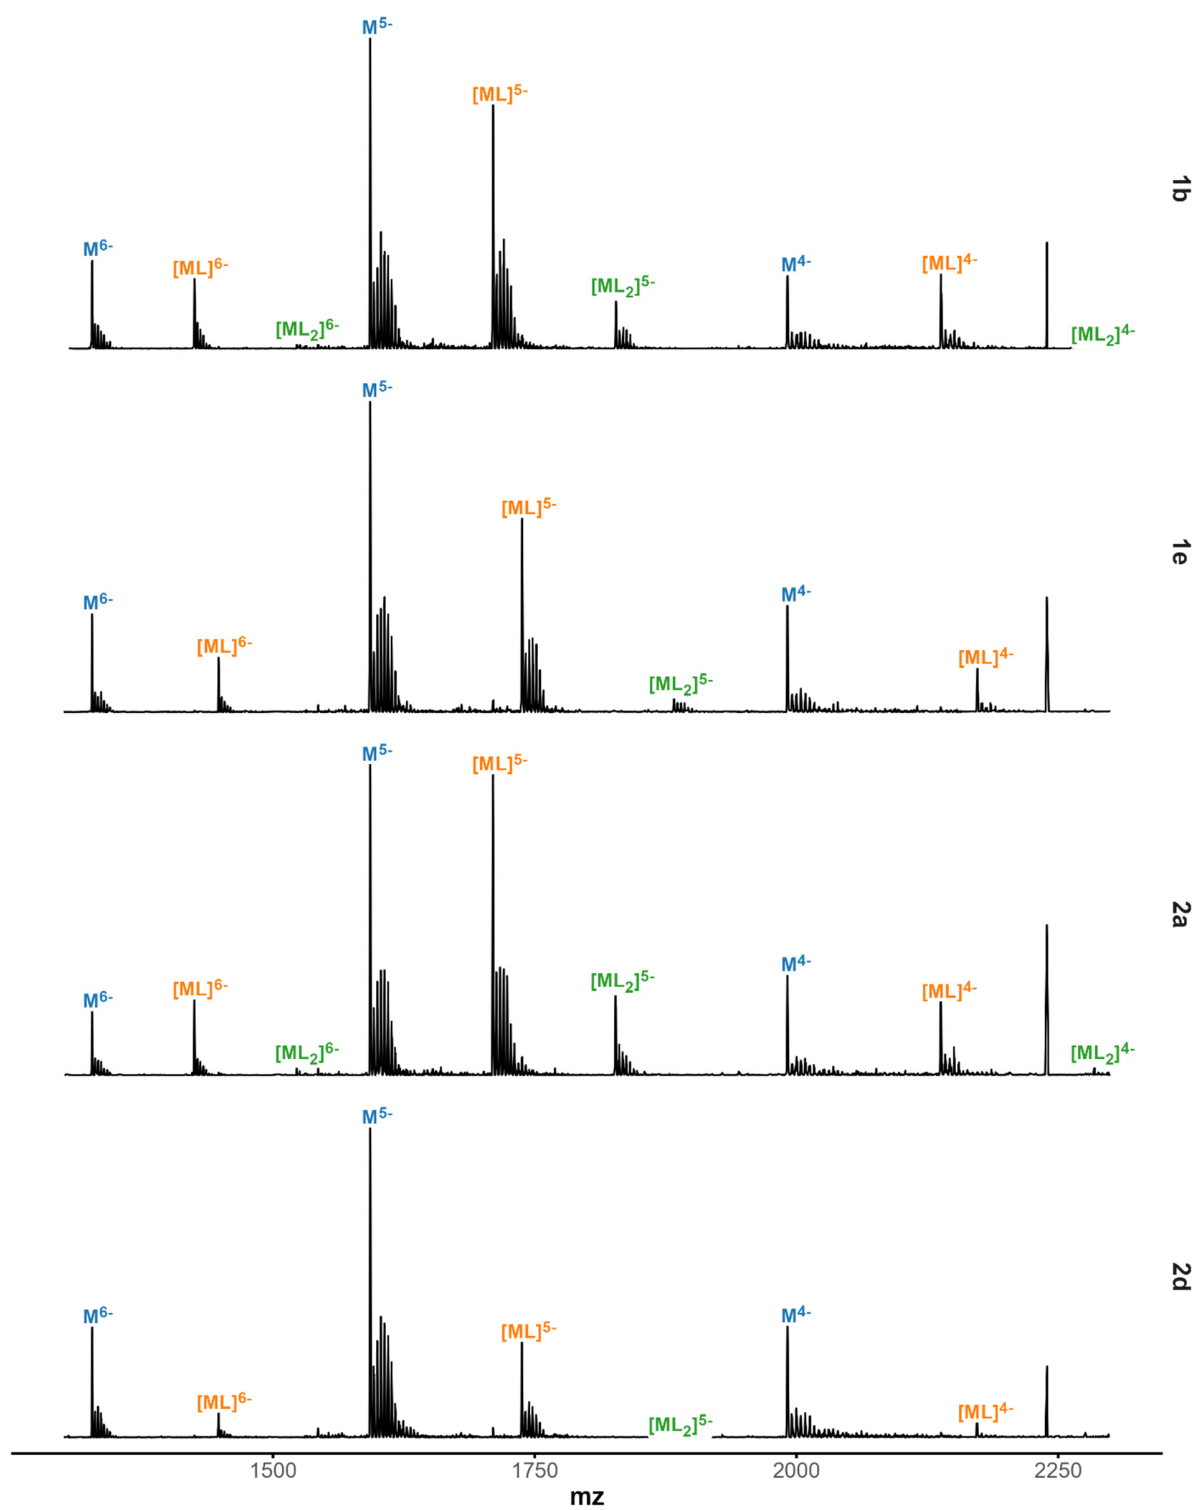

**Figure S6.** Native electrospray mass spectra of solutions containing **12b**, **12e**, **13a** or **13d** (20  $\mu$ M) with ds26 (10  $\mu$ M) in 100 mM ammonium acetate (pH = 6.8), zoomed on the 4-, 5- and 6- charge states: M = oligonucleotide monomer, L = ligand.

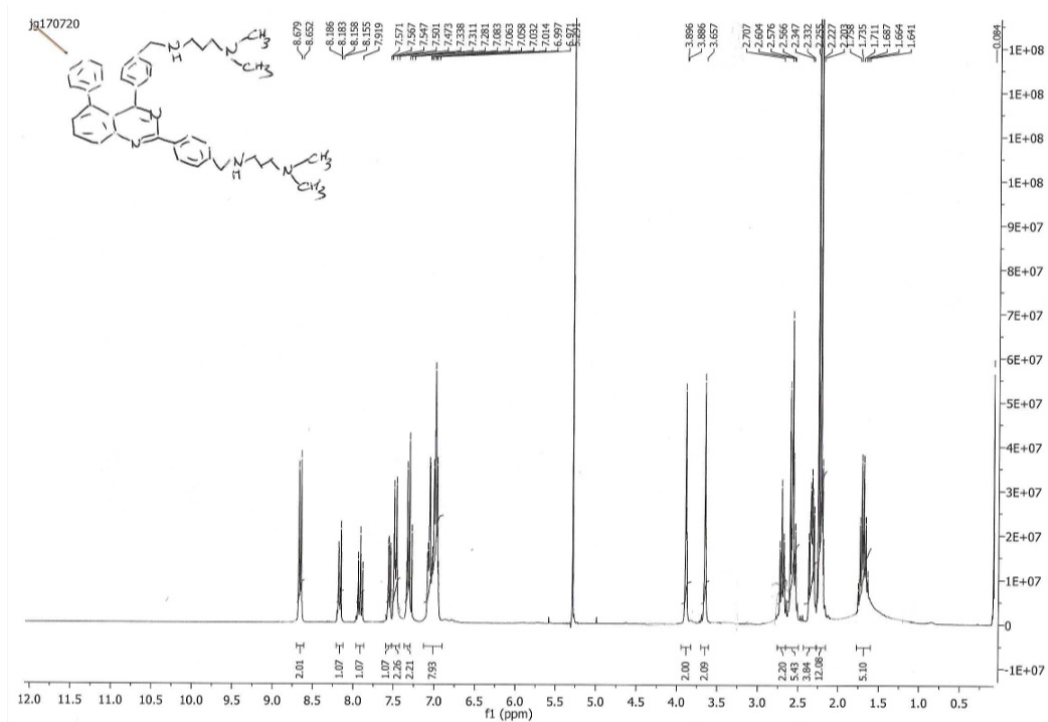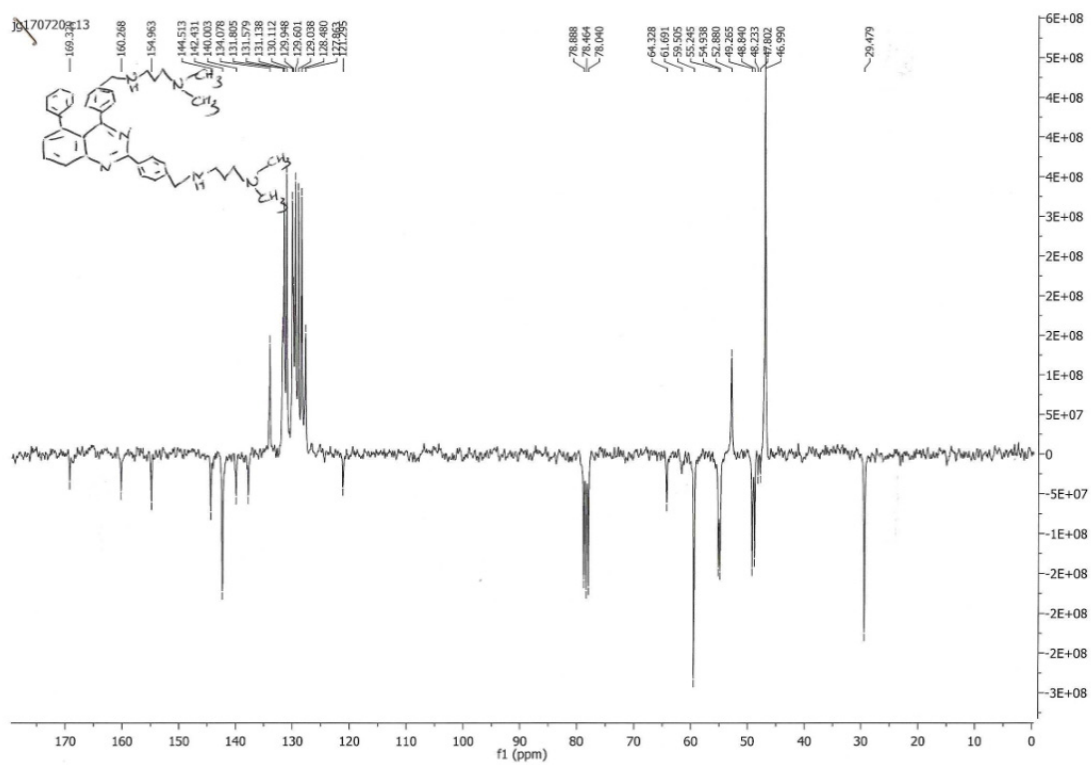

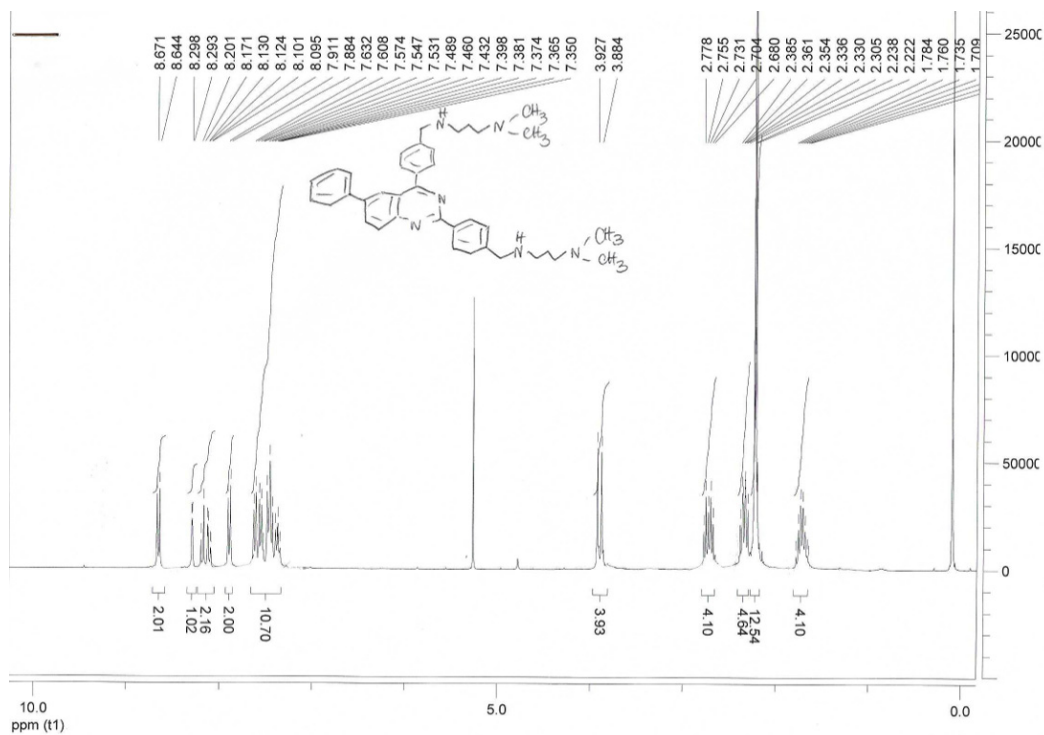

Figure S9. <sup>1</sup>H NMR spectrum of 12b.

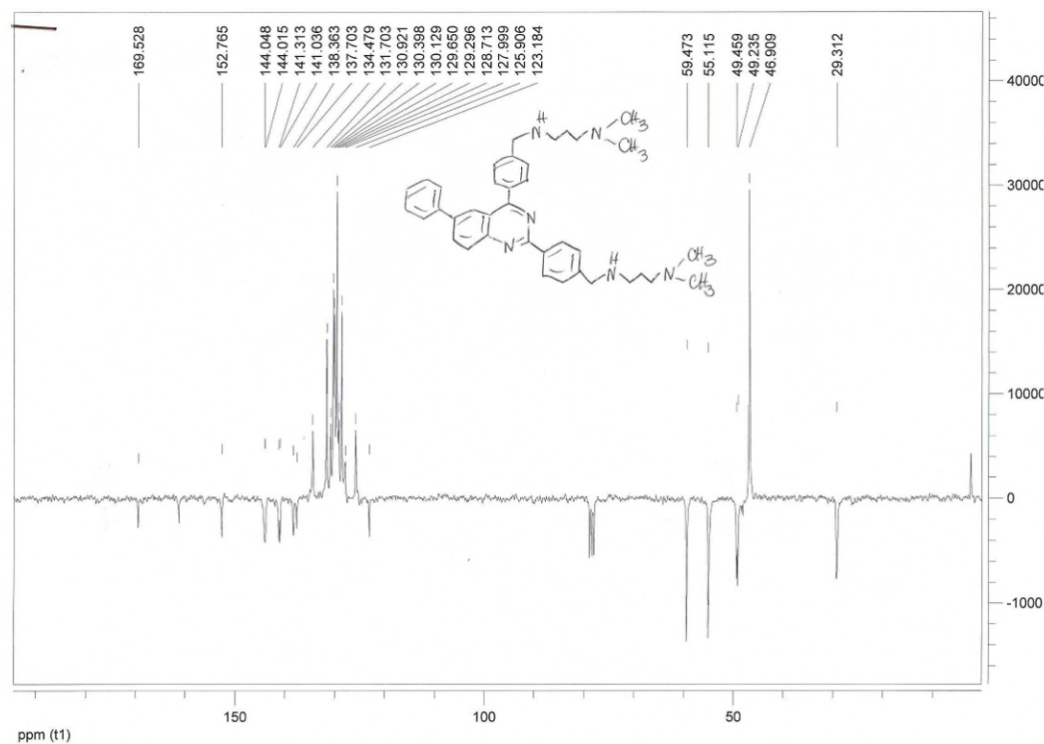

Figure S10. <sup>13</sup>C NMR spectrum of 12b.

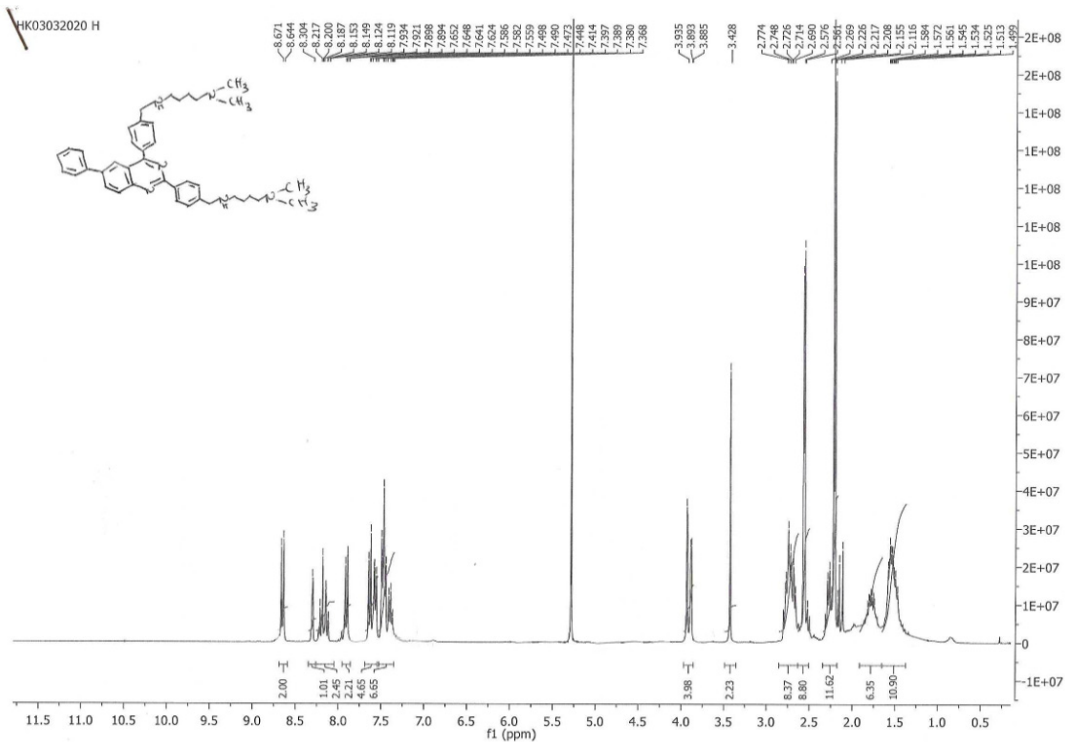

Figure S11.  $^1\text{H}$  NMR spectrum of 12c.

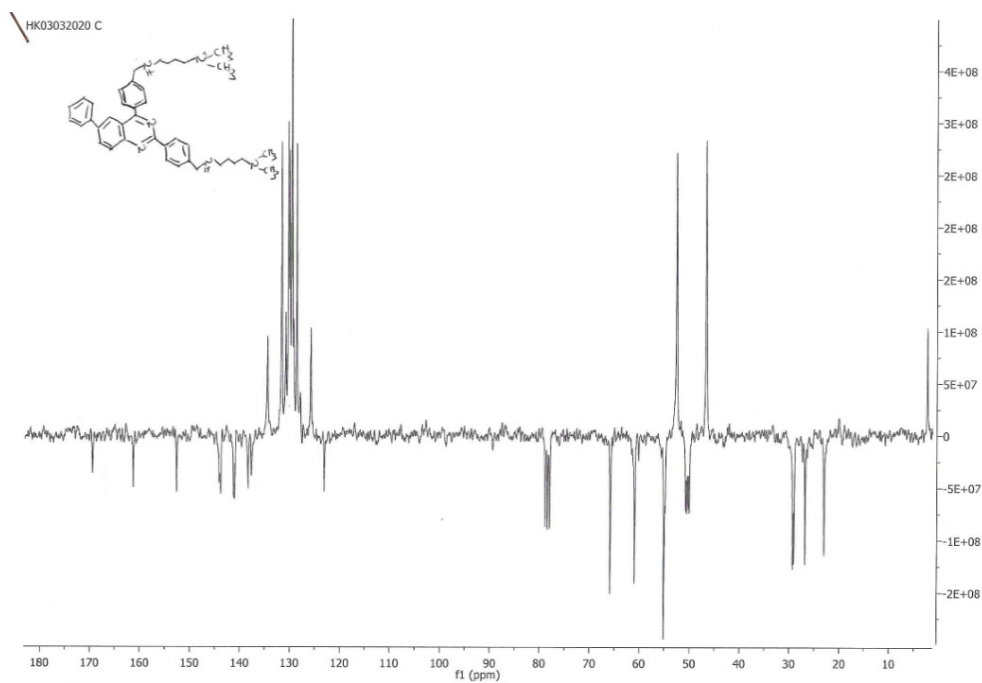

Figure S12.  $^{13}\text{C}$  NMR spectrum of 12c.

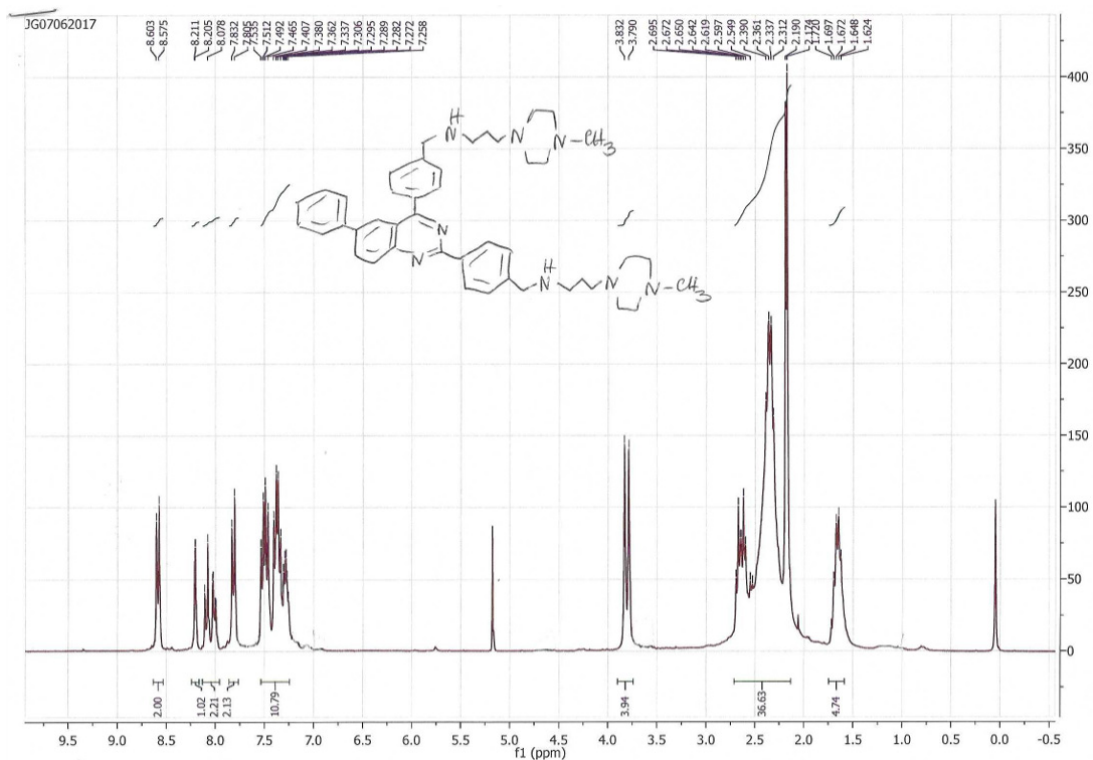

Figure S13.  $^1\text{H}$  NMR spectrum of 12d.

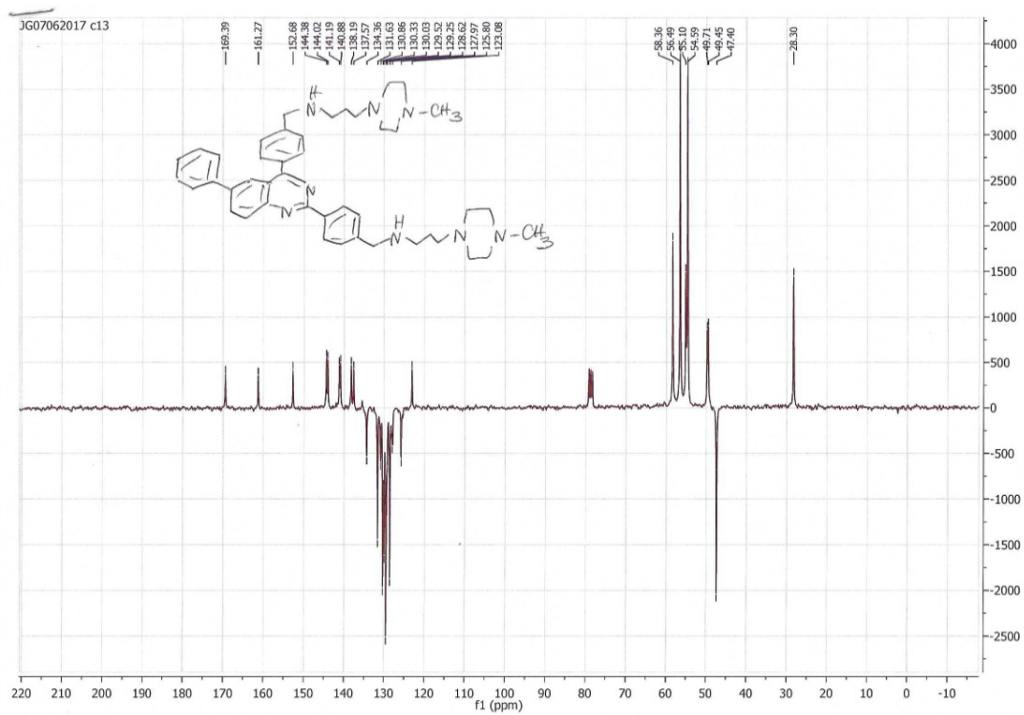

Figure S14.  $^{13}\text{C}$  NMR spectrum of 12d.

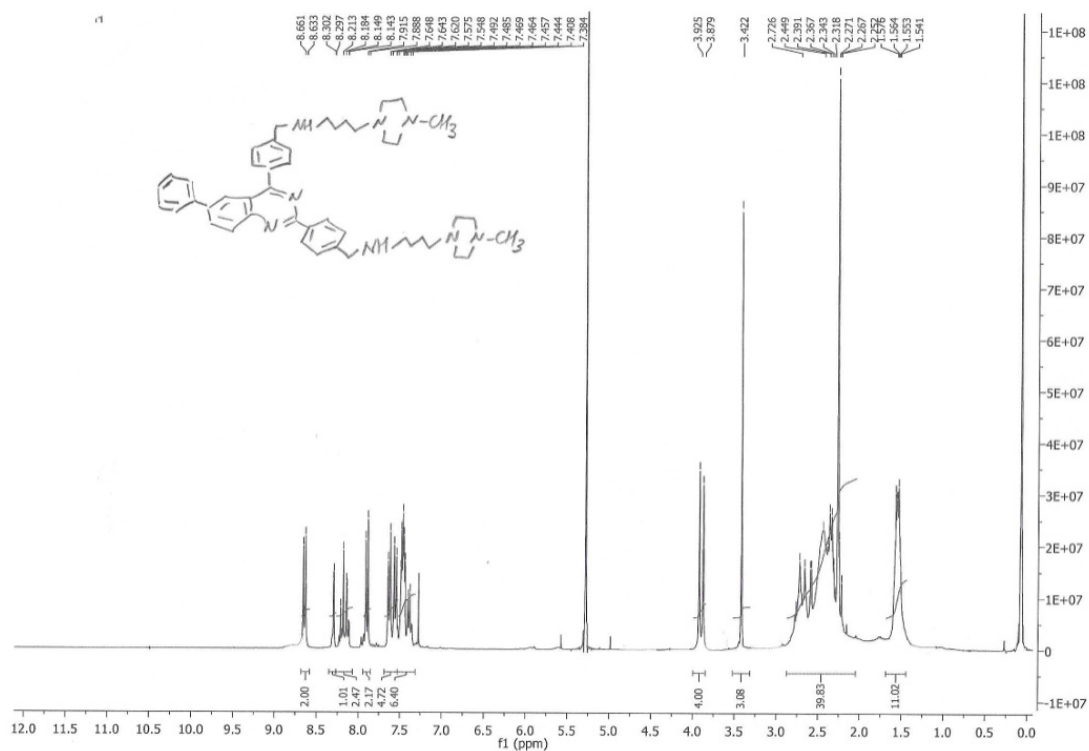

Figure S15. <sup>1</sup>H NMR spectrum of 12e.

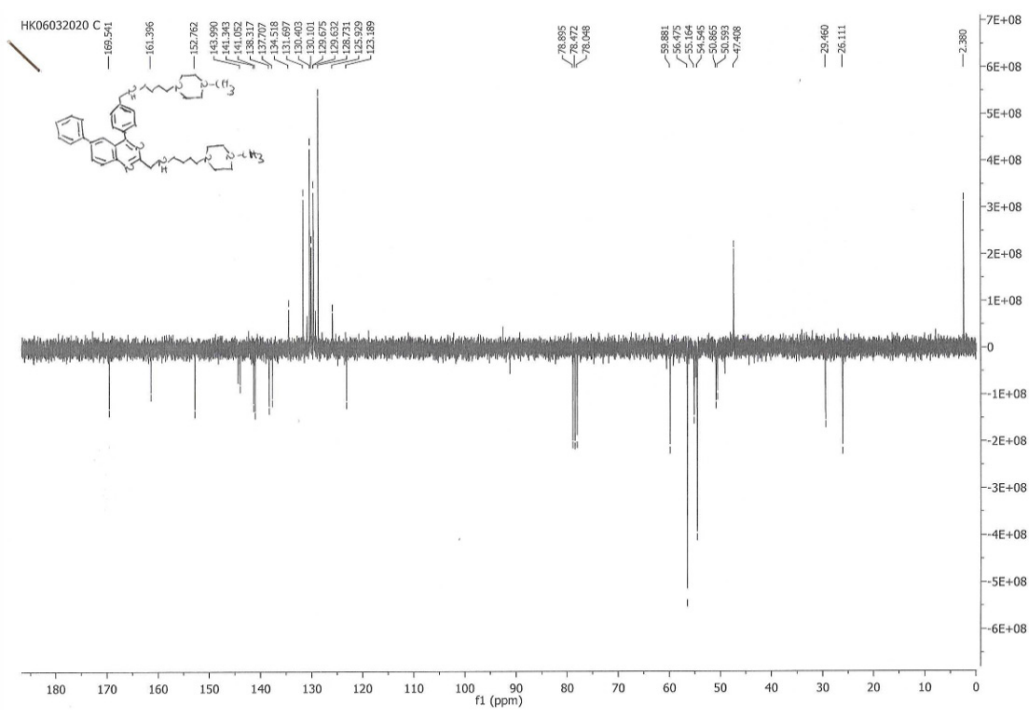

Figure S16. <sup>13</sup>C NMR spectrum of 12e.

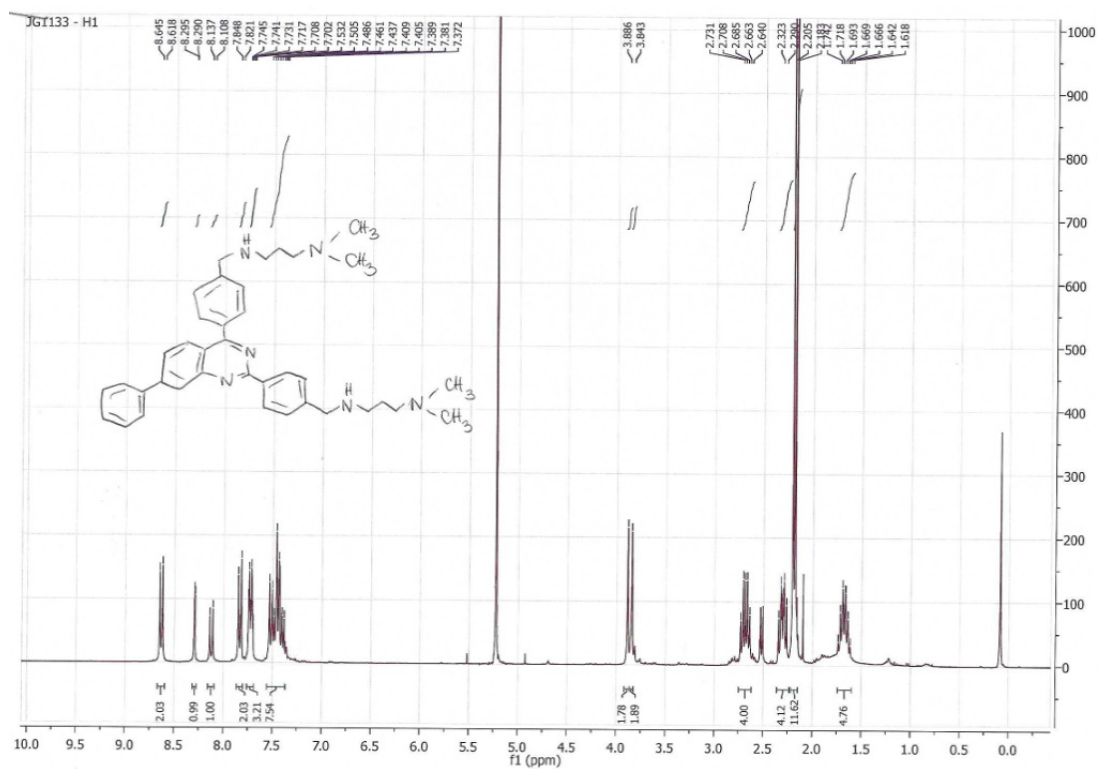

Figure S17.  $^1\text{H}$  NMR spectrum of 12f.

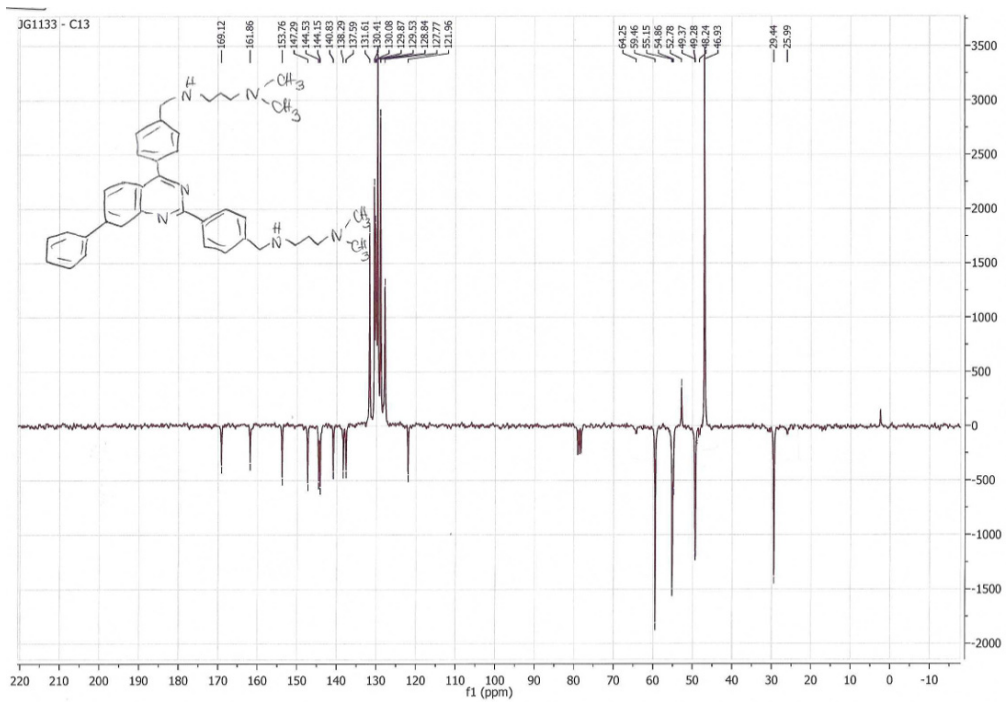

Figure S18.  $^{13}\text{C}$  NMR spectrum of 12f.

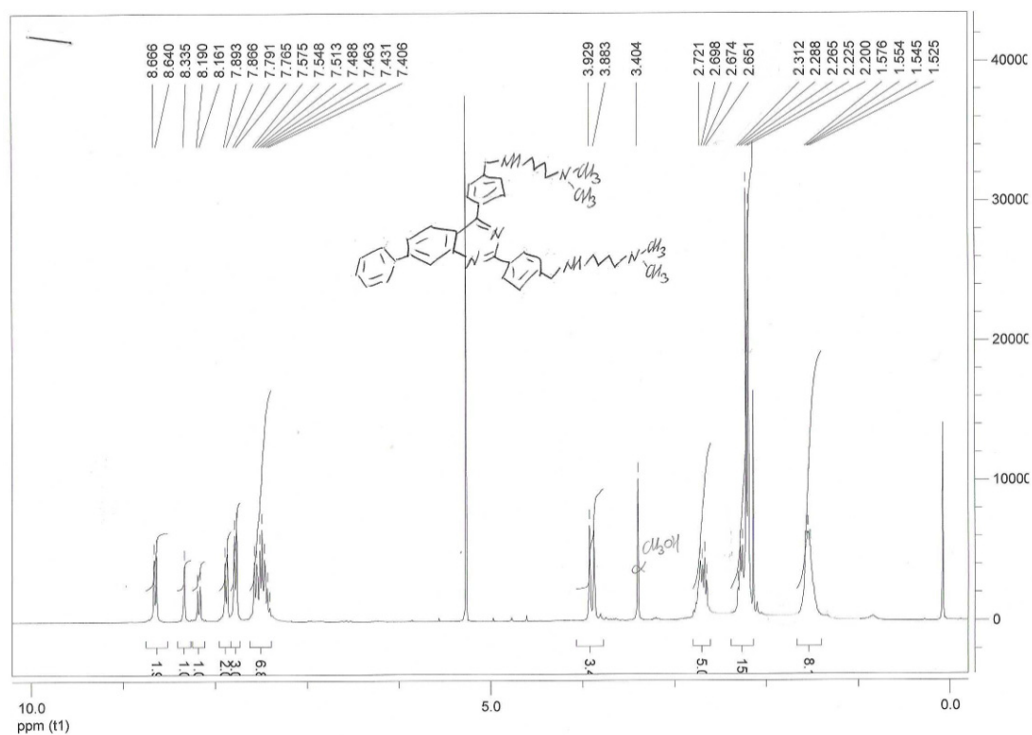

Figure S19. <sup>1</sup>H NMR spectrum of **12g**.

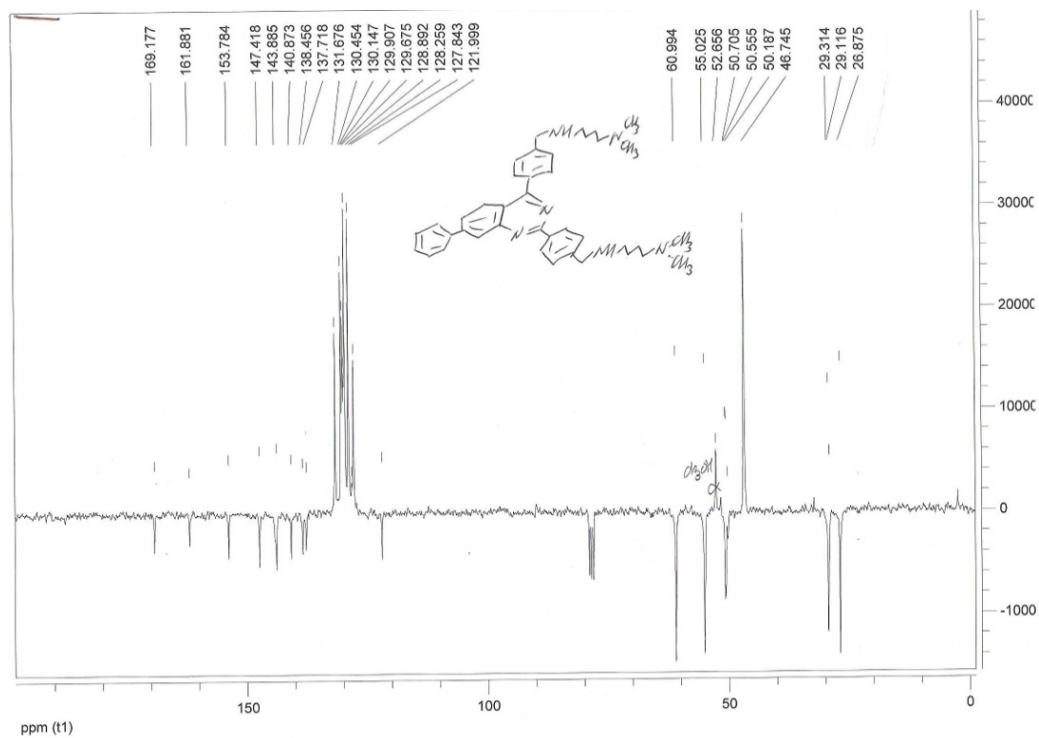

Figure S20. <sup>13</sup>C NMR spectrum of **12g**.

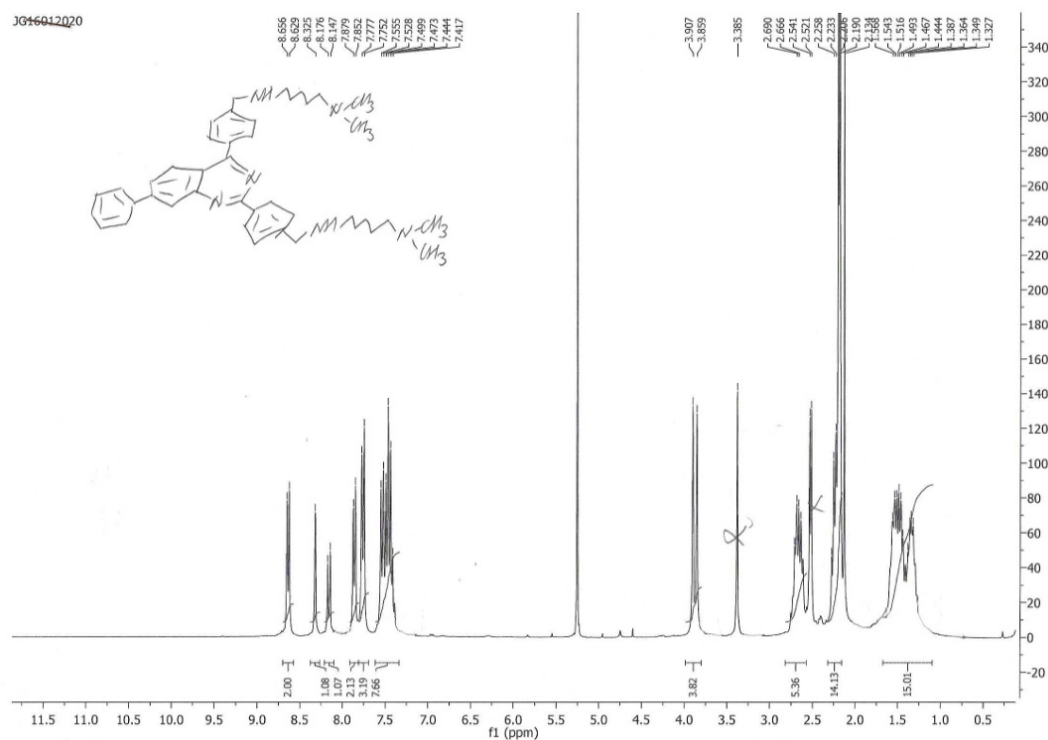

Figure S21. <sup>1</sup>H NMR spectrum of 12h.

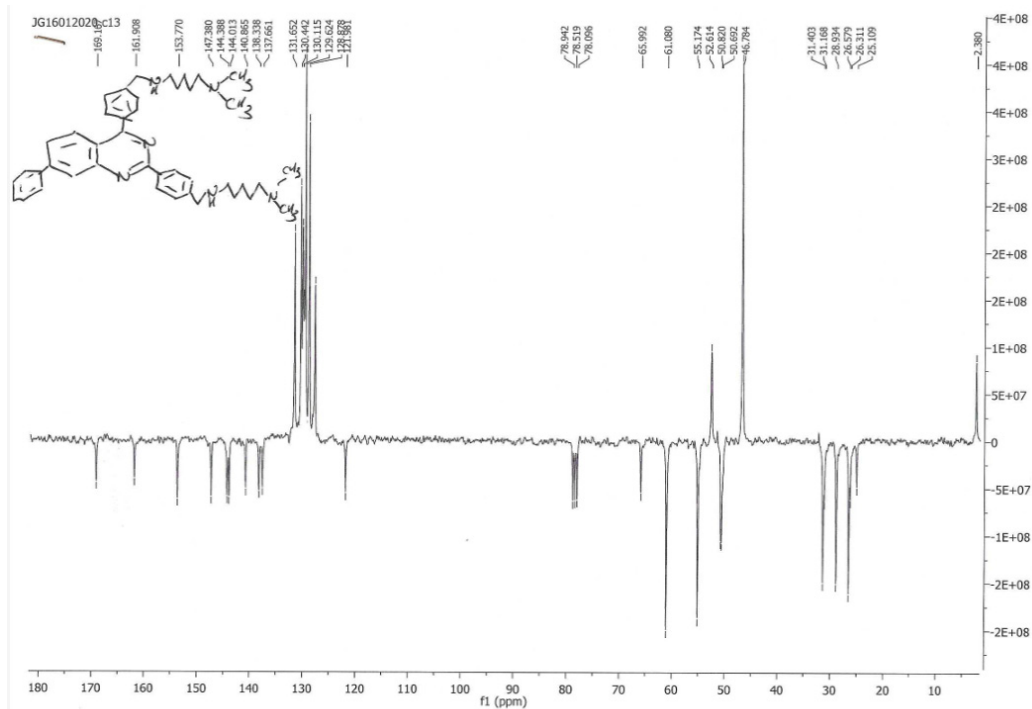

Figure S22. <sup>13</sup>C NMR spectrum of 12h.

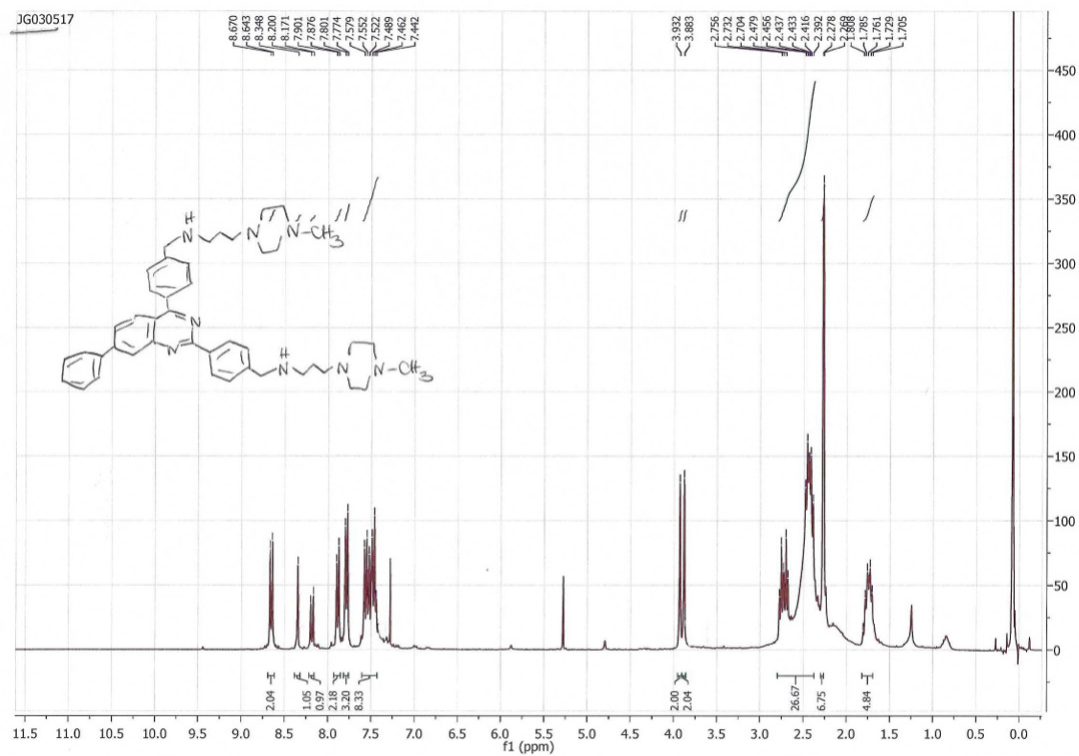

Figure S23.  $^1\text{H}$  NMR spectrum of 12i.

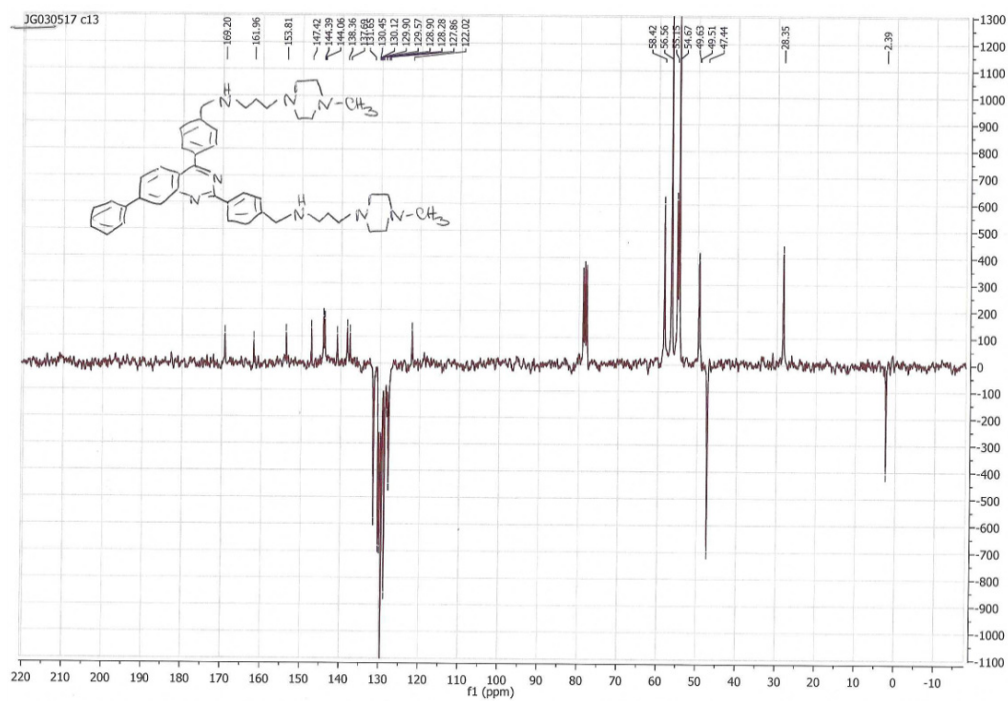

Figure S24.  $^{13}\text{C}$  NMR spectrum of 12i.

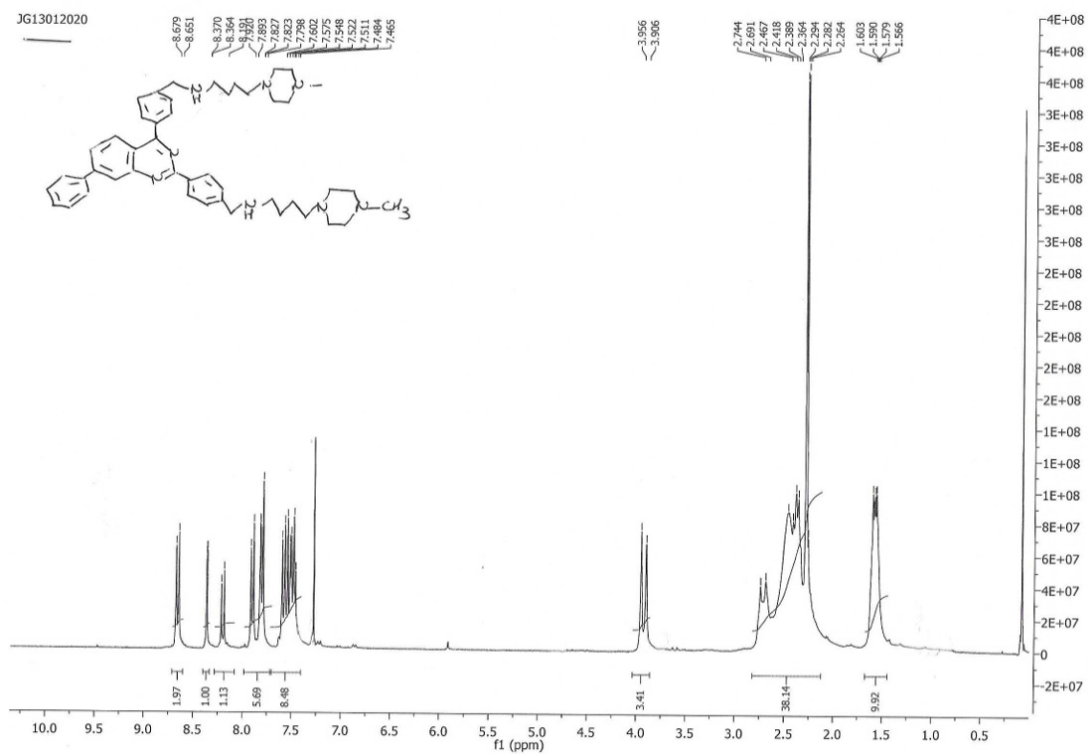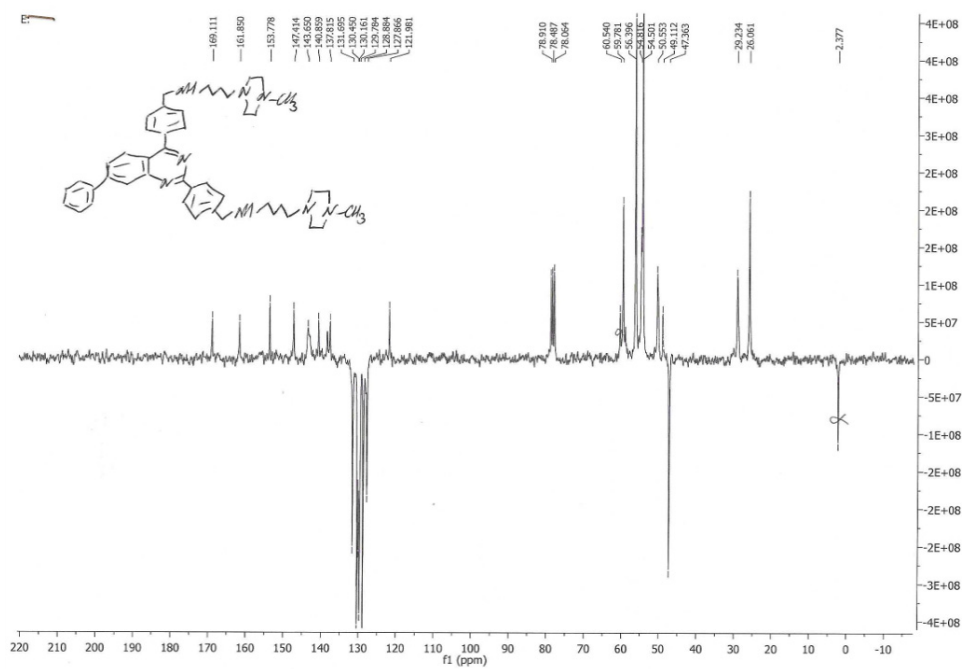

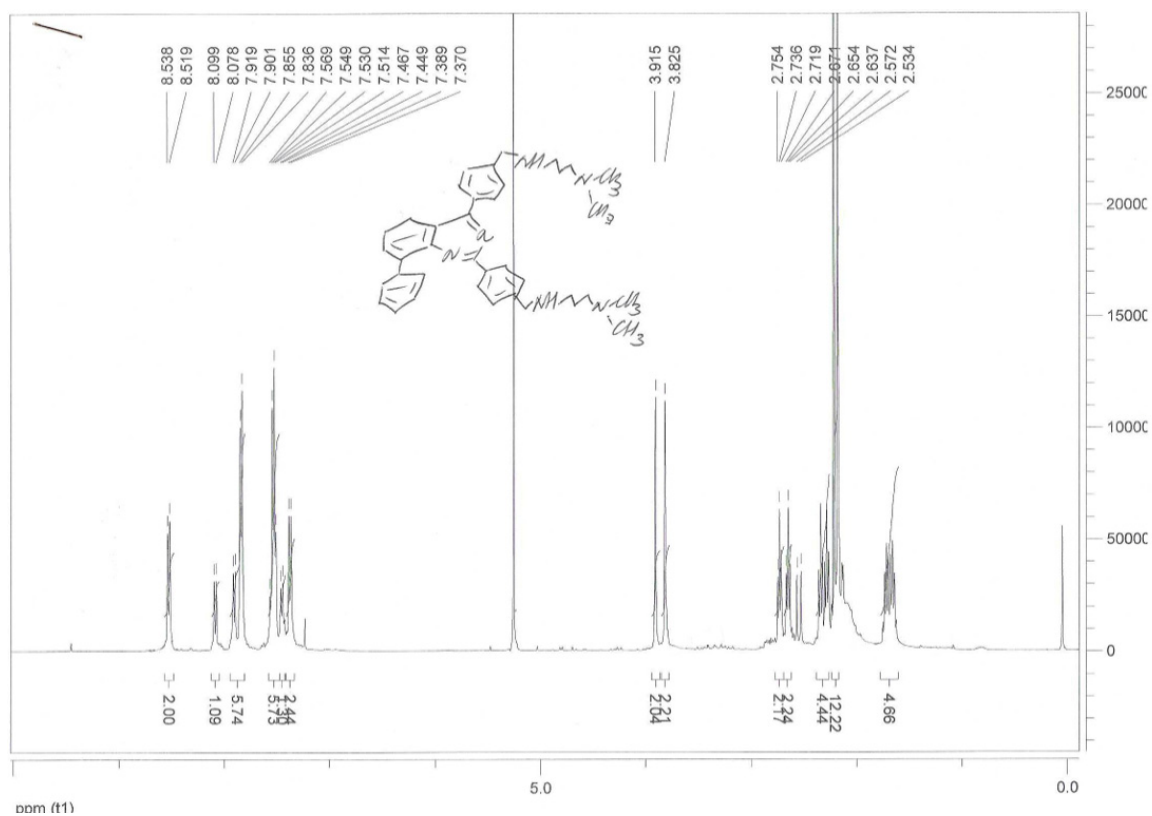

Figure S27. <sup>1</sup>H NMR spectrum of 12k.

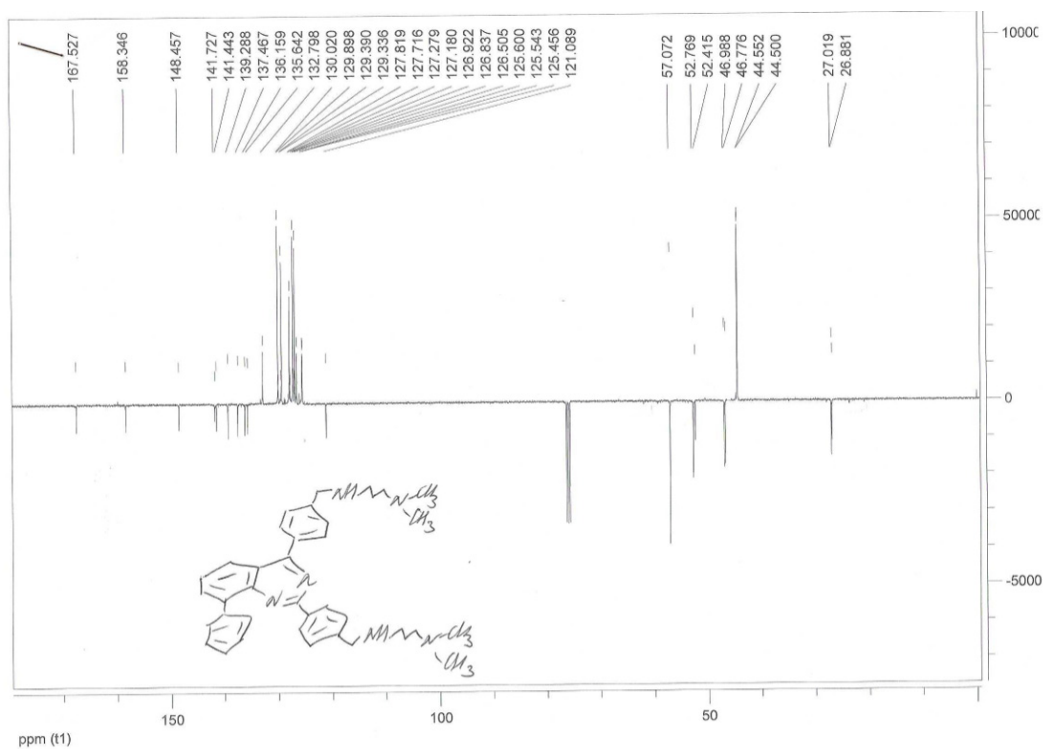

Figure S28. <sup>13</sup>C NMR spectrum of 12k.

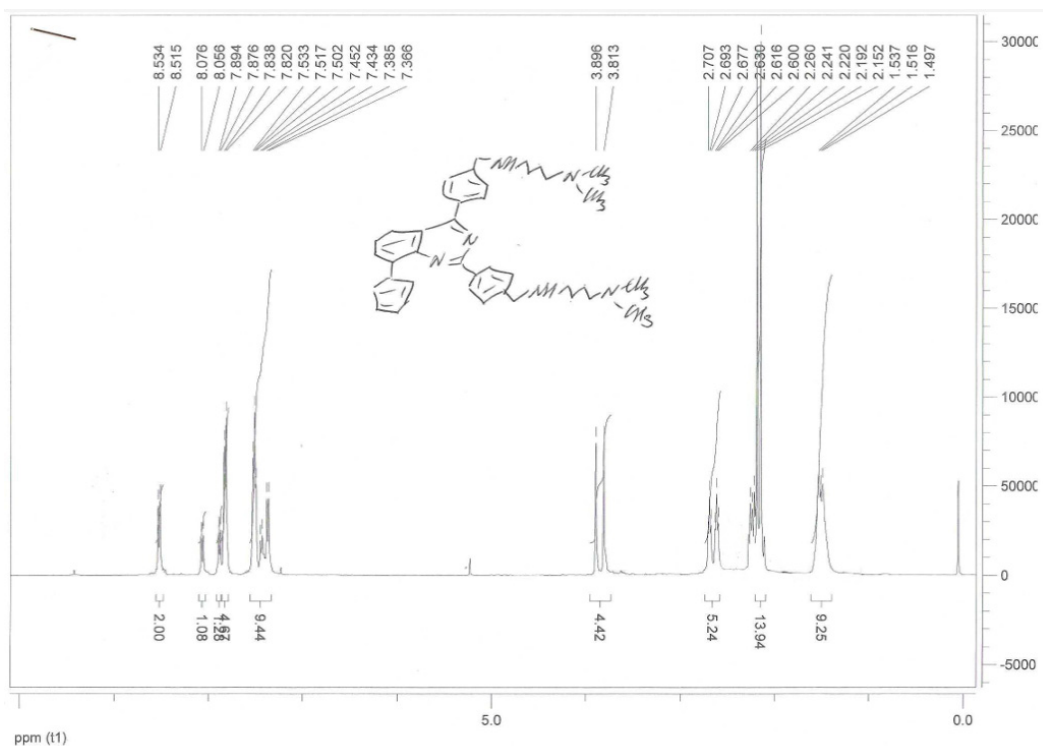

Figure S29. <sup>1</sup>H NMR spectrum of 12l.

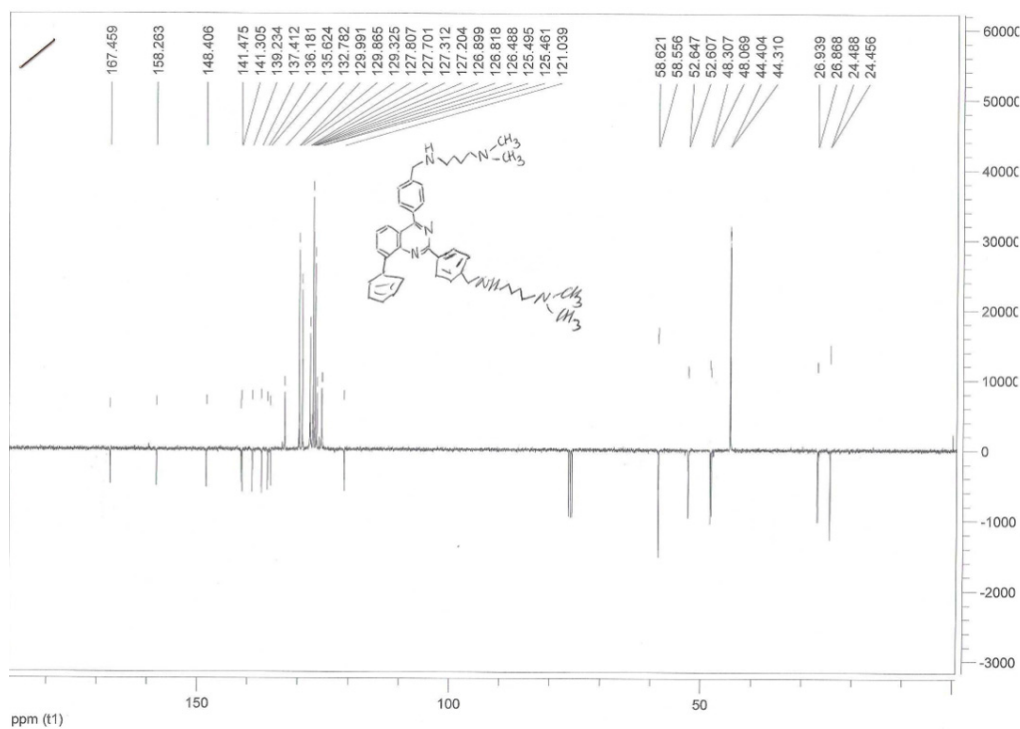

Figure S30. <sup>13</sup>C NMR spectrum of 12l.

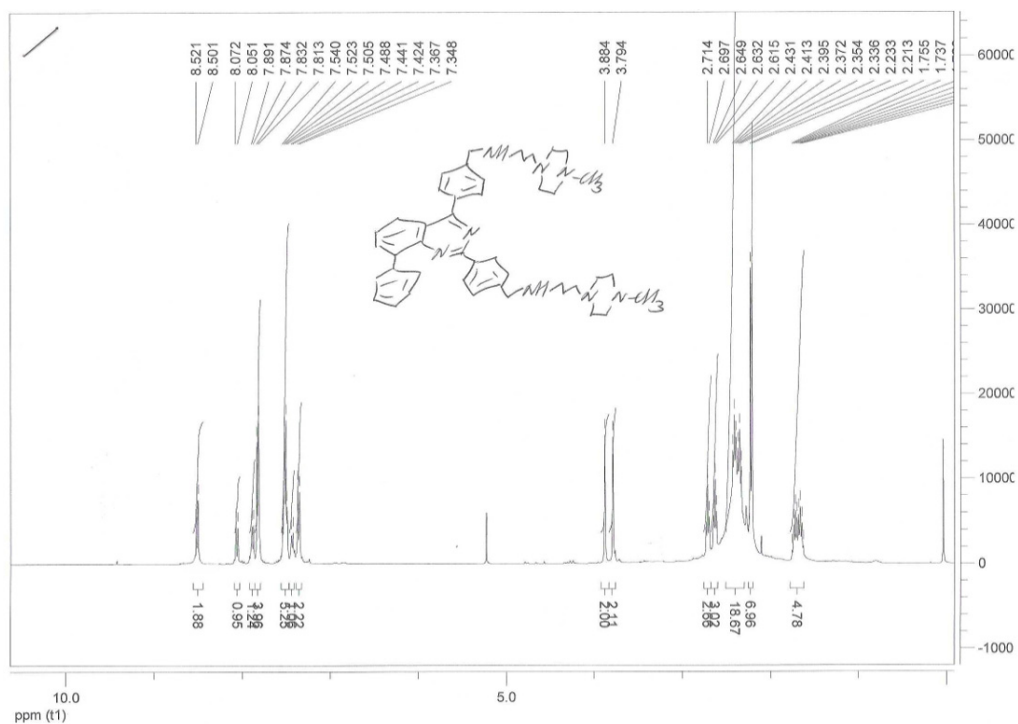

Figure S31. <sup>1</sup>H NMR spectrum of 12m.

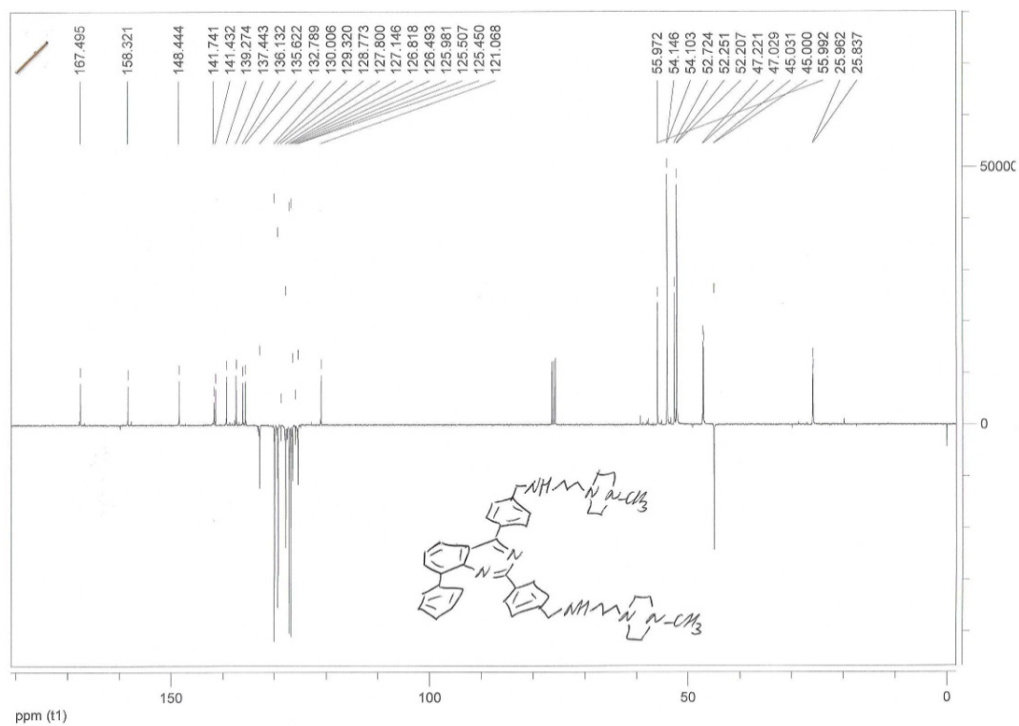

Figure S32. <sup>13</sup>C NMR spectrum of 12m.

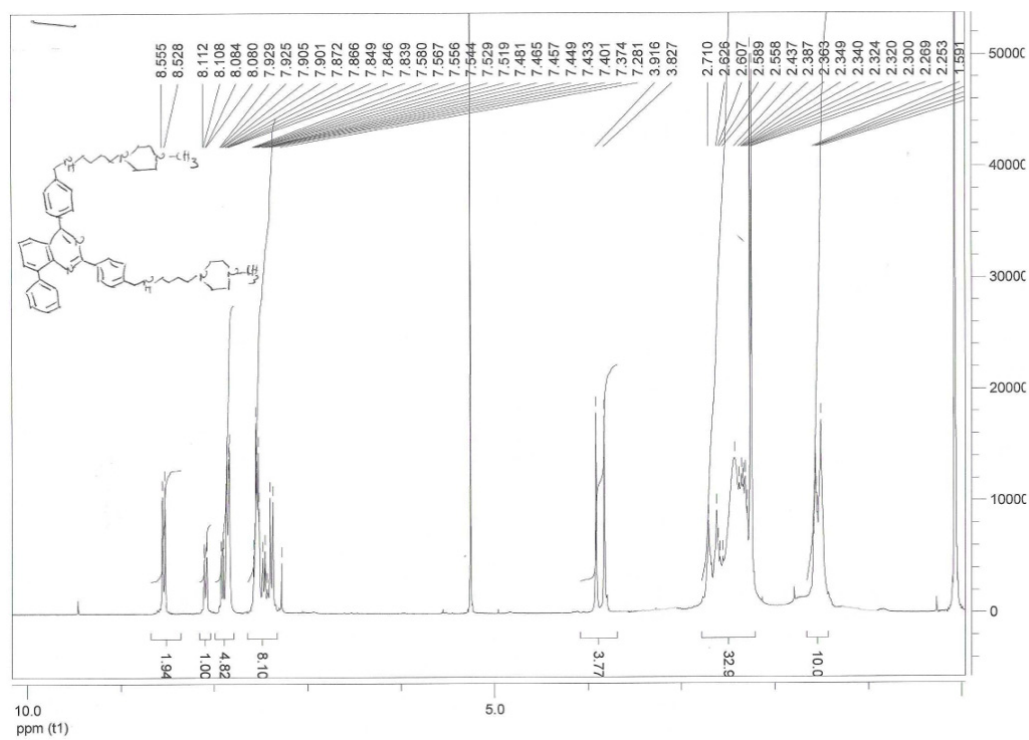

Figure S33. <sup>1</sup>H NMR spectrum of 12n.

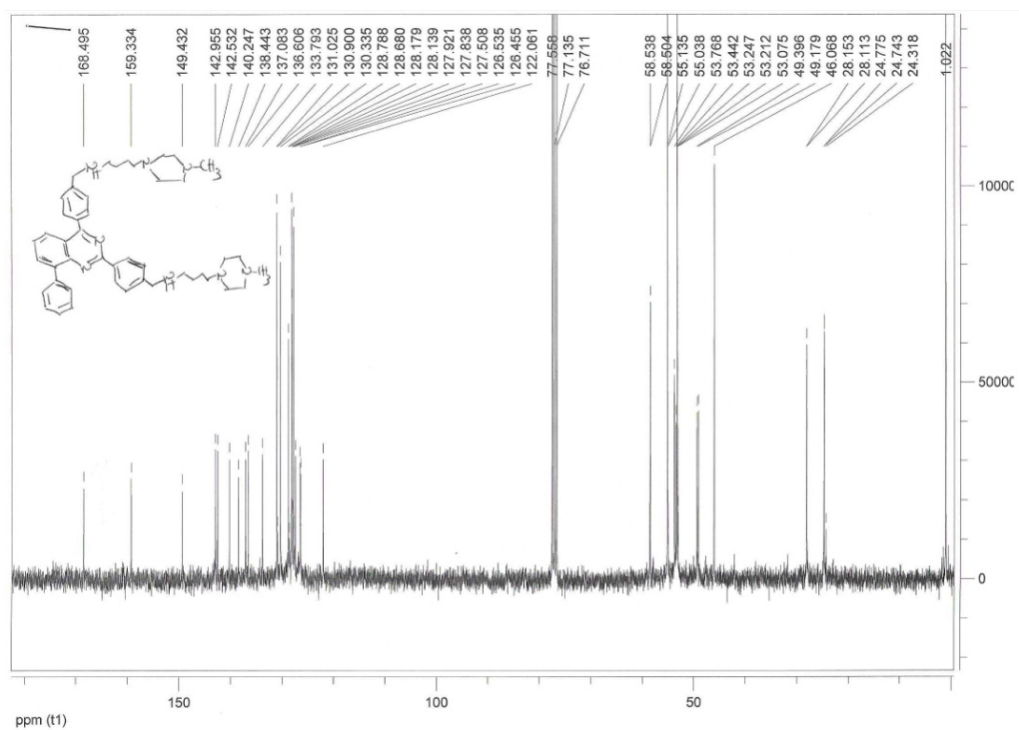

Figure S34. <sup>13</sup>C NMR spectrum of 12n.

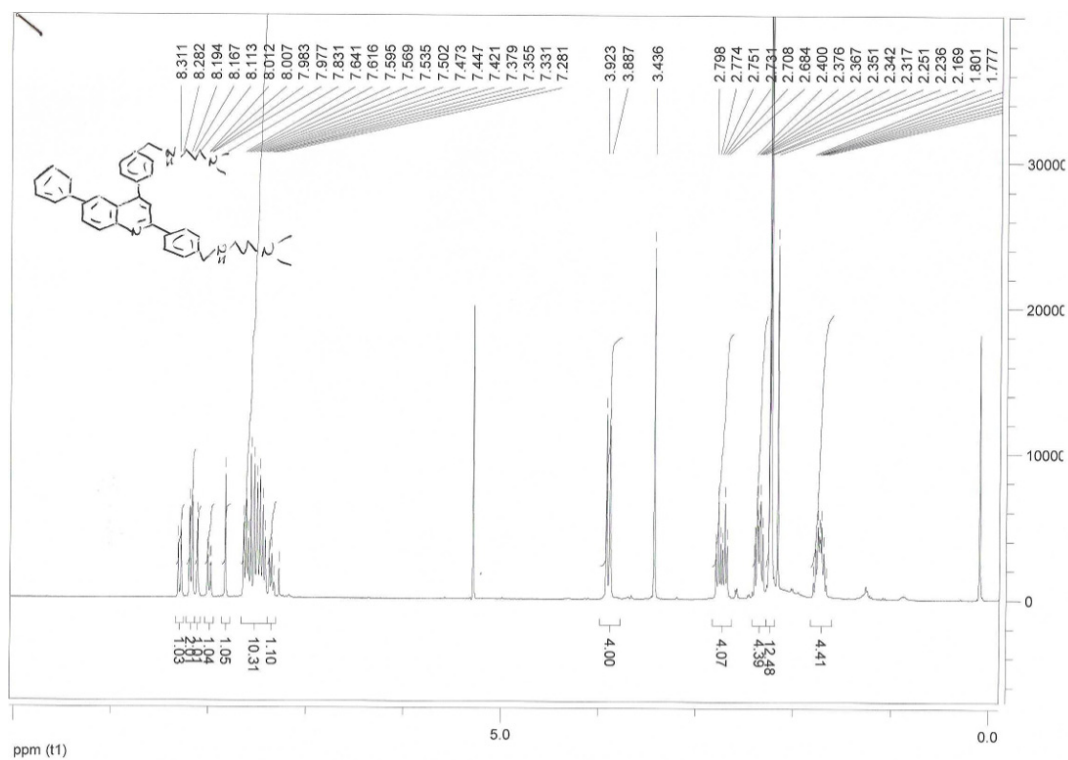

Figure S35.  $^1\text{H}$  NMR spectrum of 13a.

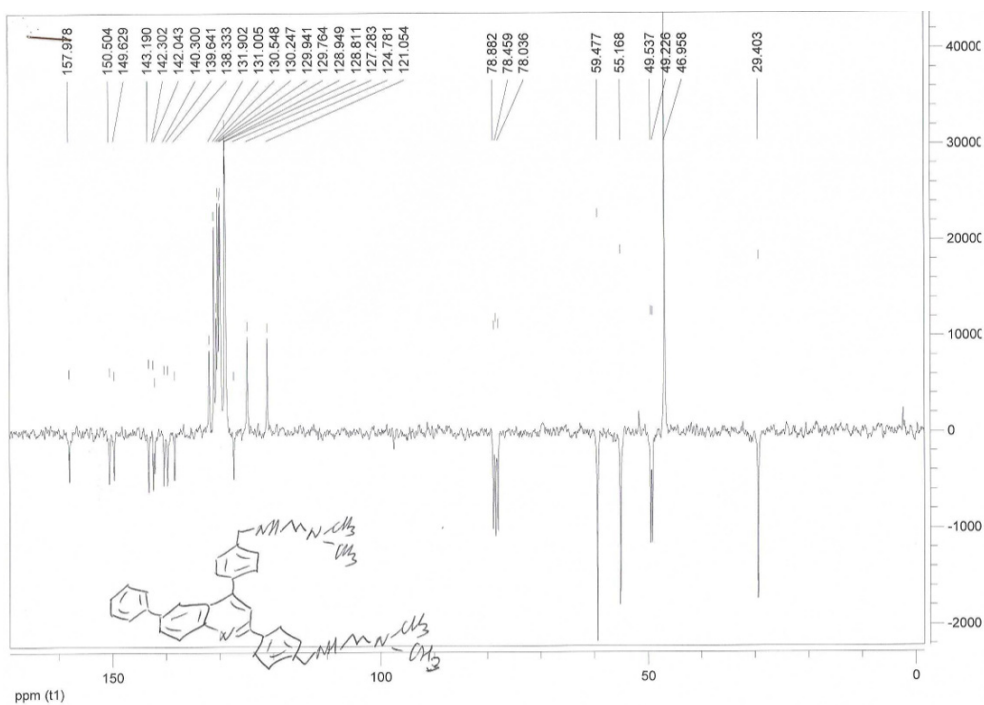

Figure S36.  $^{13}\text{C}$  NMR spectrum of 13a.

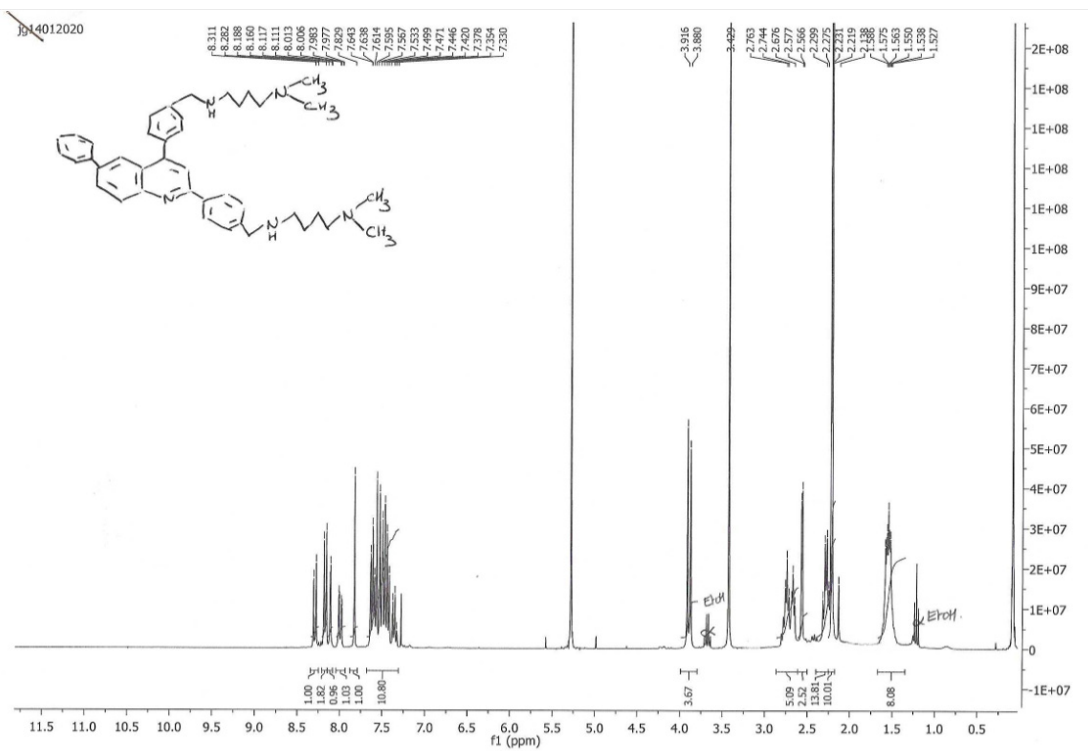

Figure S37. <sup>1</sup>H NMR spectrum of 13b.

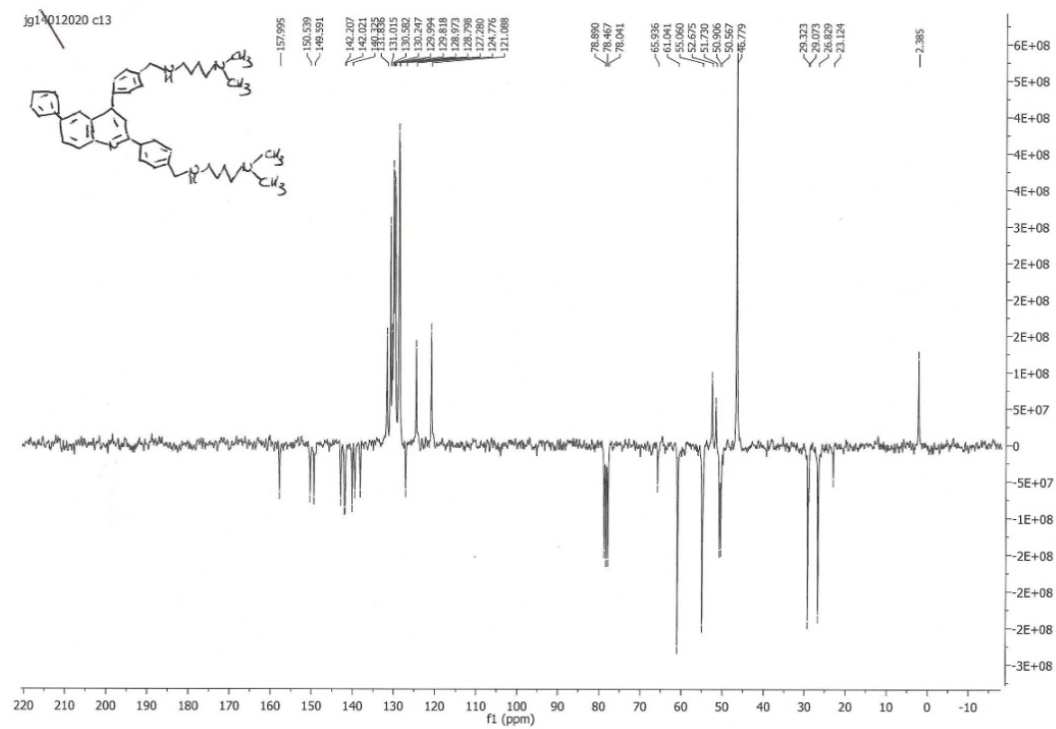

Figure S38. <sup>13</sup>C NMR spectrum of 13b.

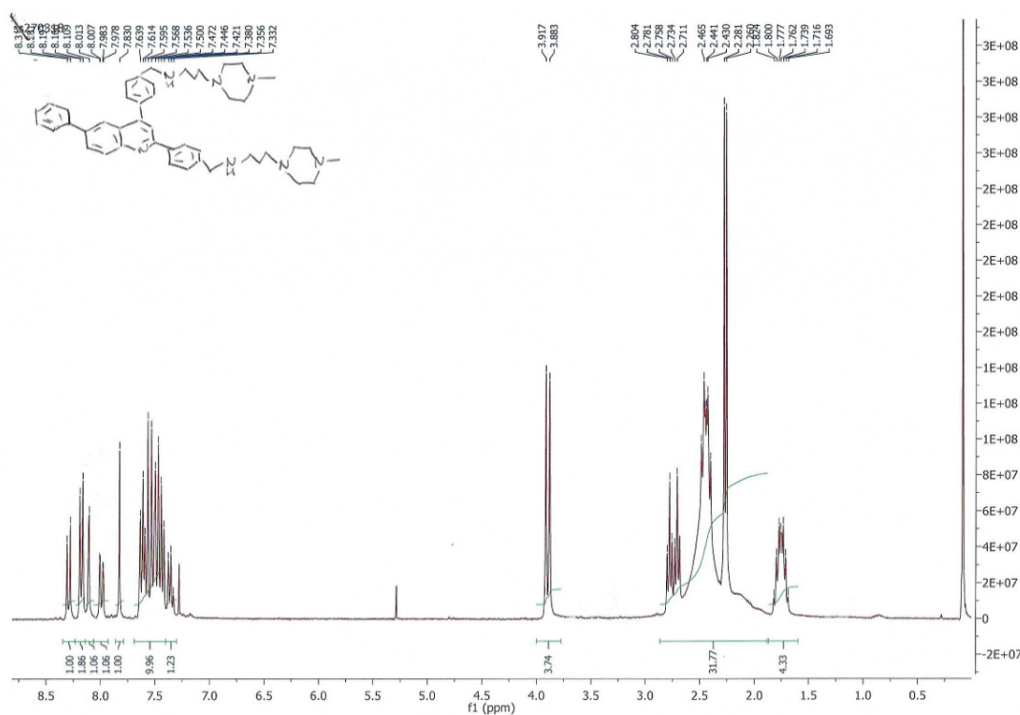

Figure S39. <sup>1</sup>H NMR spectrum of 13c.

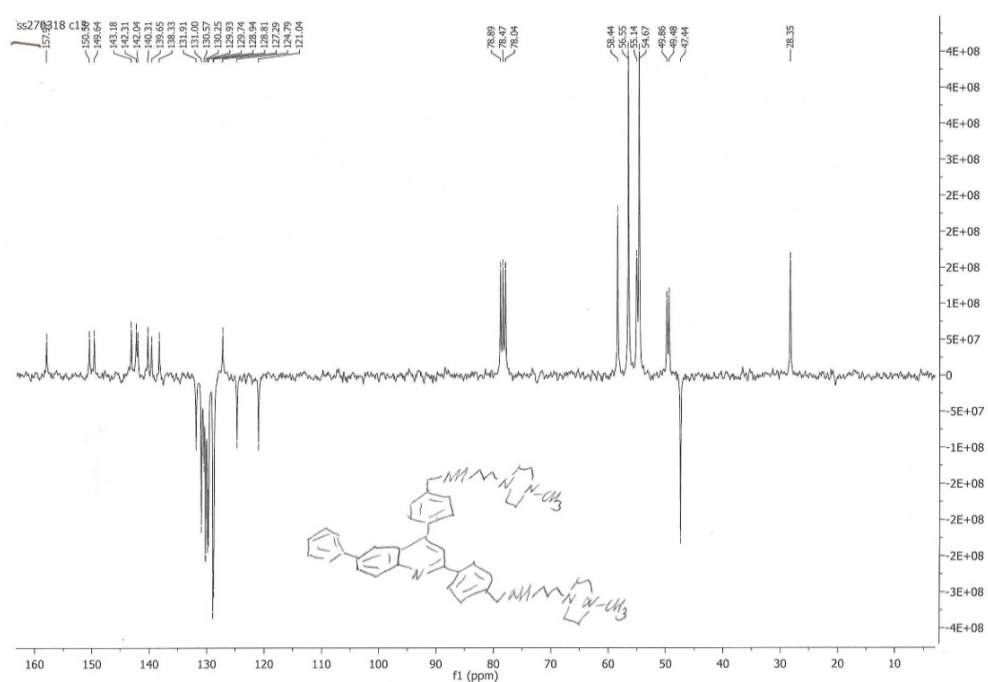

Figure S40. <sup>13</sup>C NMR spectrum of 13c.

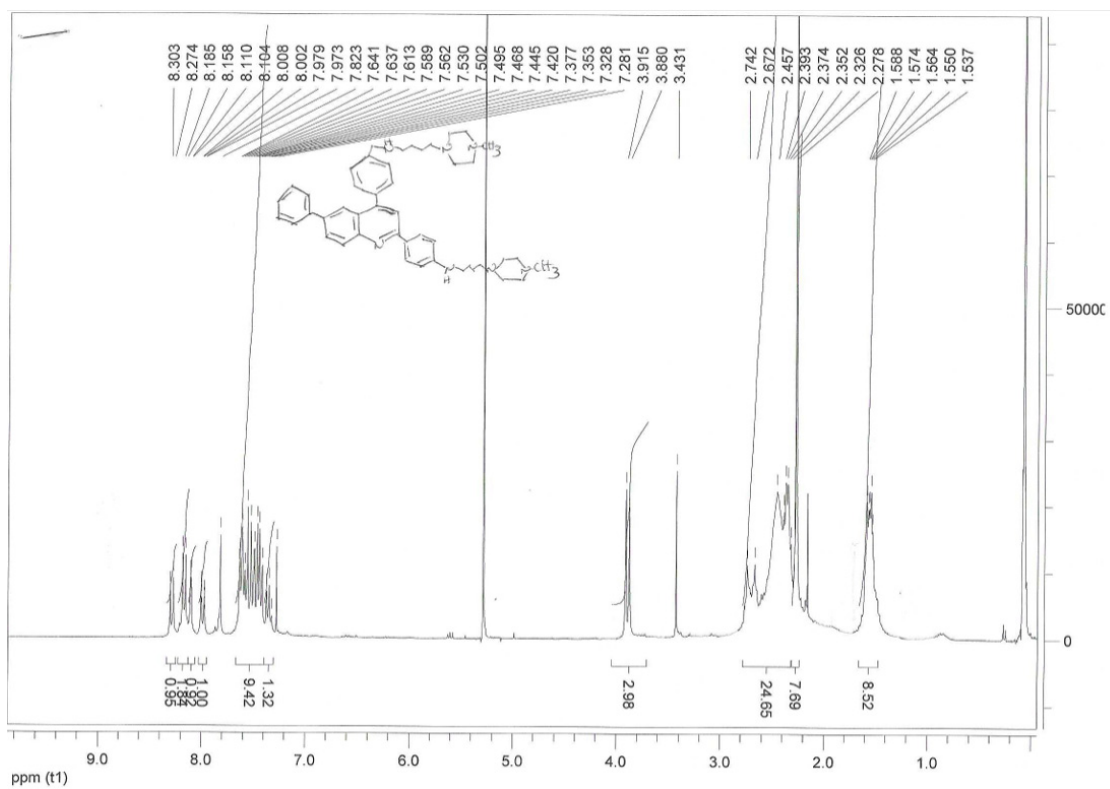

Figure S41. <sup>1</sup>H NMR spectrum of 13d.

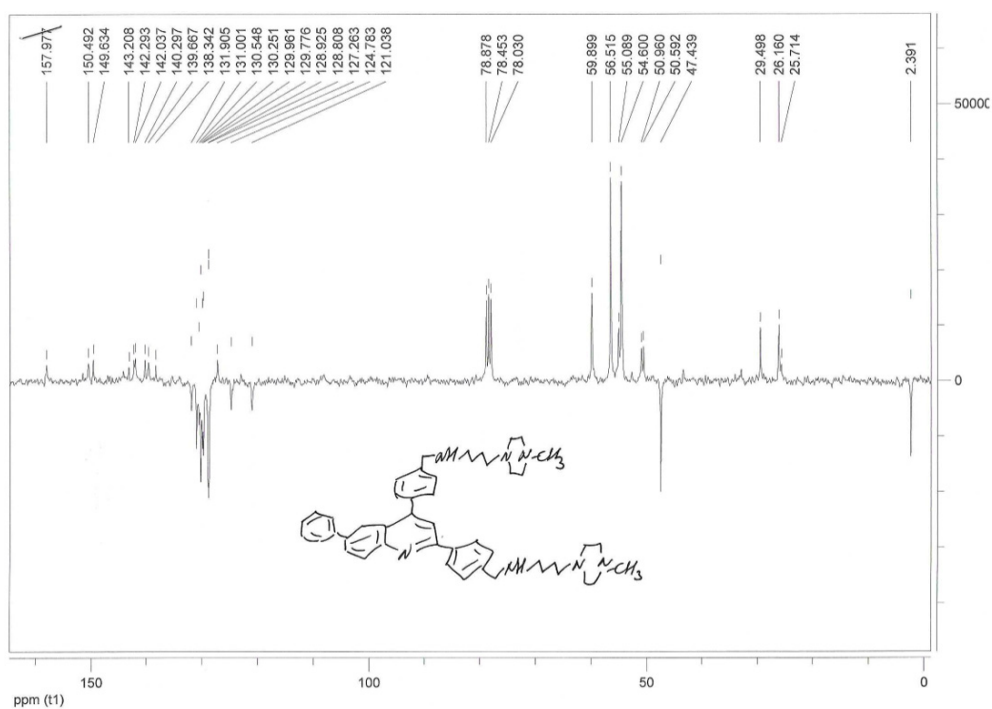

Figure S42. <sup>13</sup>C NMR spectrum of 13d.

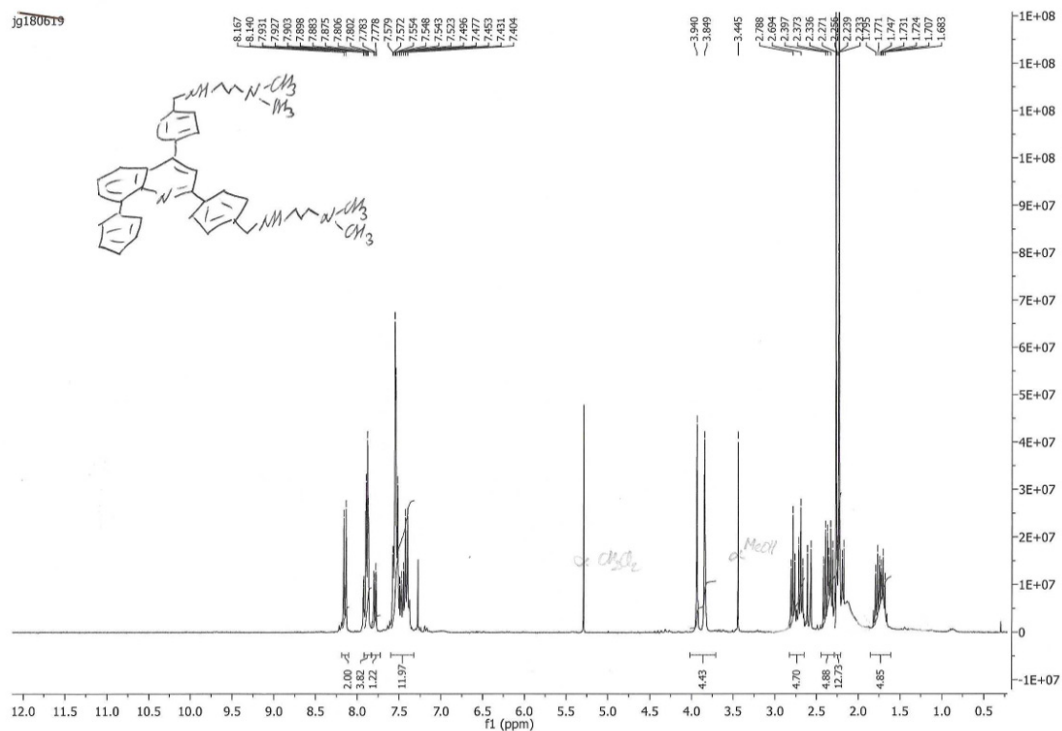

Figure S43. <sup>1</sup>H NMR spectrum of 13e.

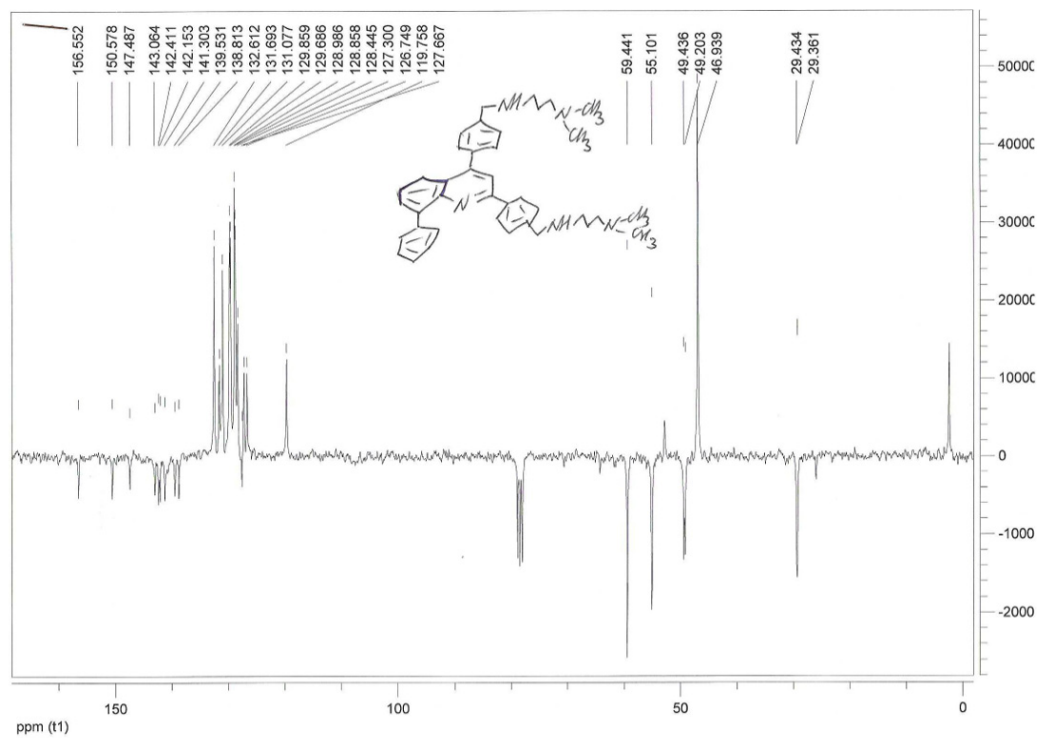

Figure S44. <sup>13</sup>C NMR spectrum of 13e.

JG1468\_200617091047 #1 RT: 0.01 AV: 1 NL: 4.97E7  
T: FTMS Lp-ESI-Lens [150.00-2000.00]

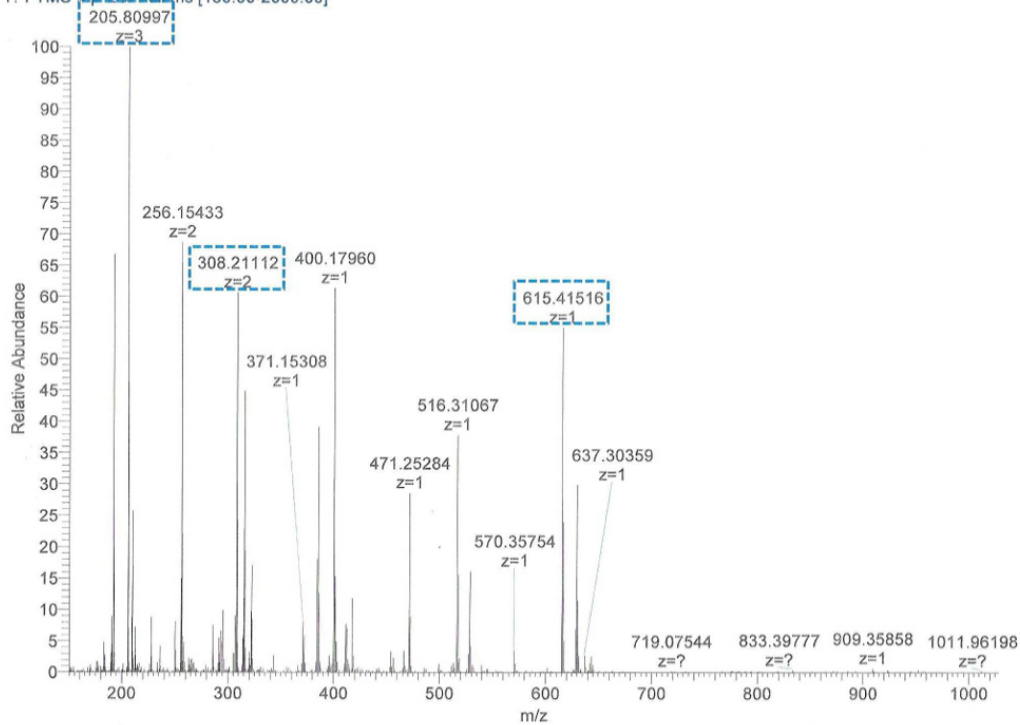

Figure S45. ESI-MS data for compound 12a.

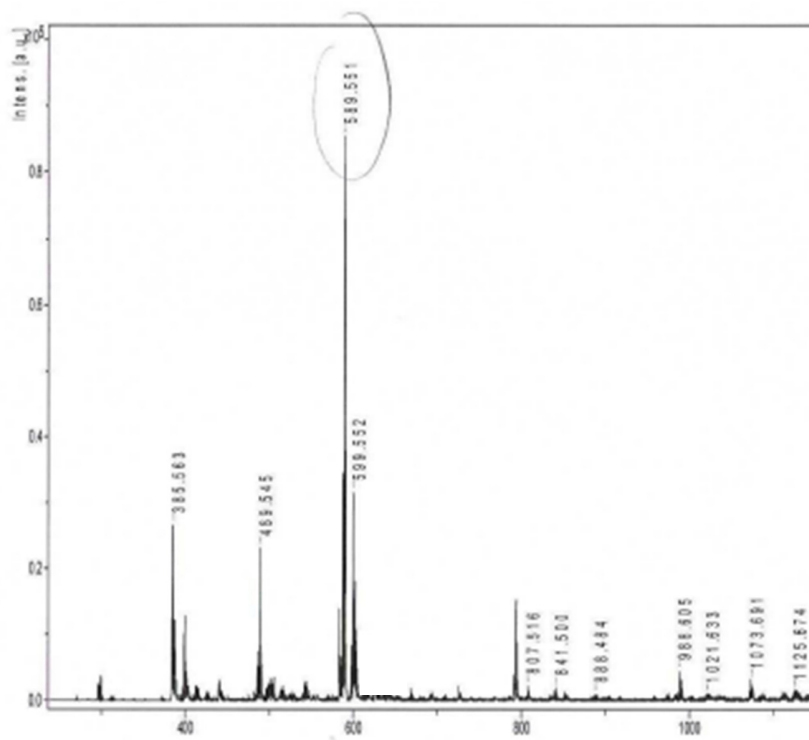

Figure S46. ESI-MS data for compound 12b.

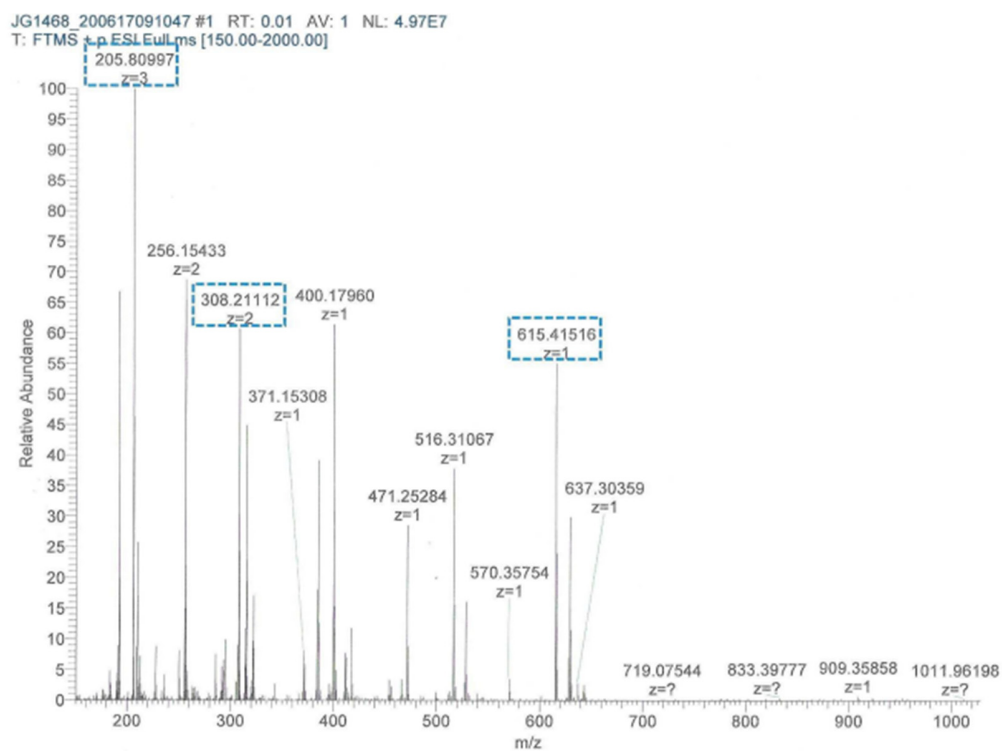

Figure S47. ESI-MS data for compound 12c.

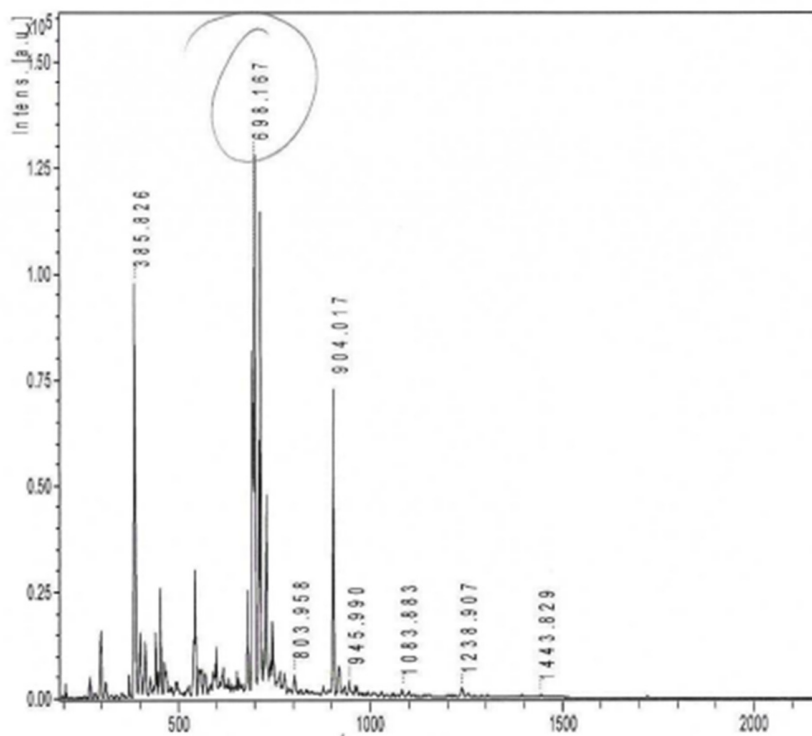

Figure S48. ESI-MS data for compound 12d.

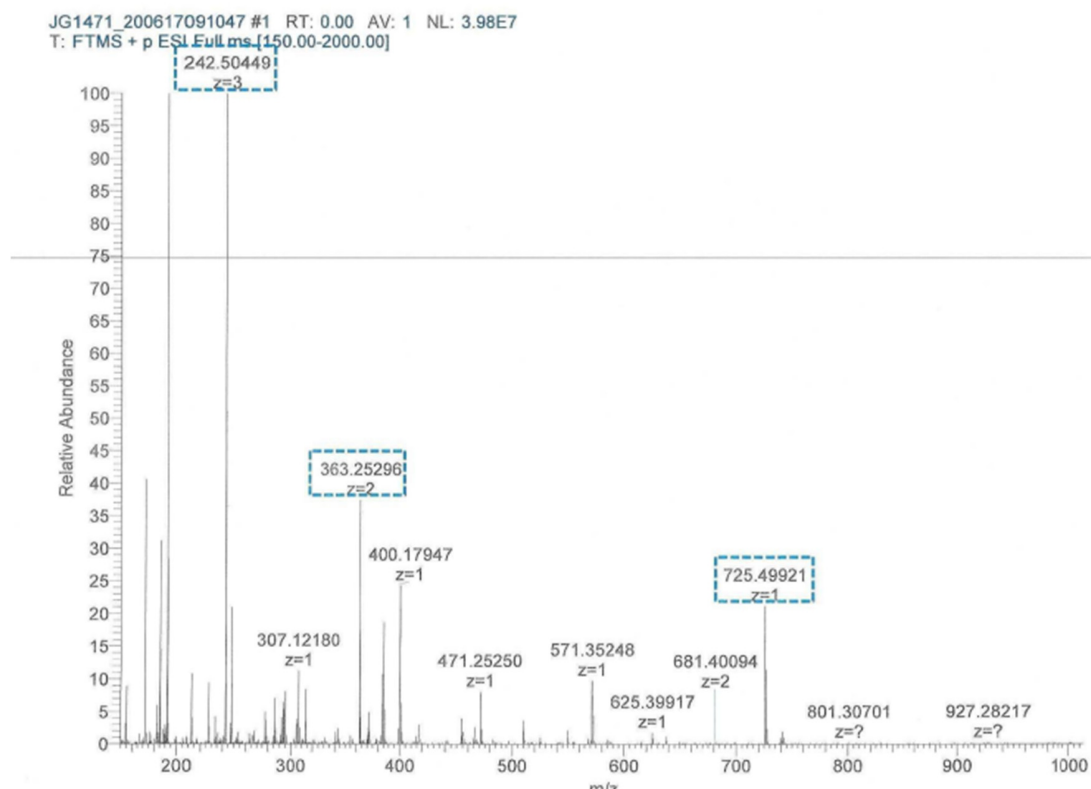

Figure S49. ESI-MS data for compound 12e.

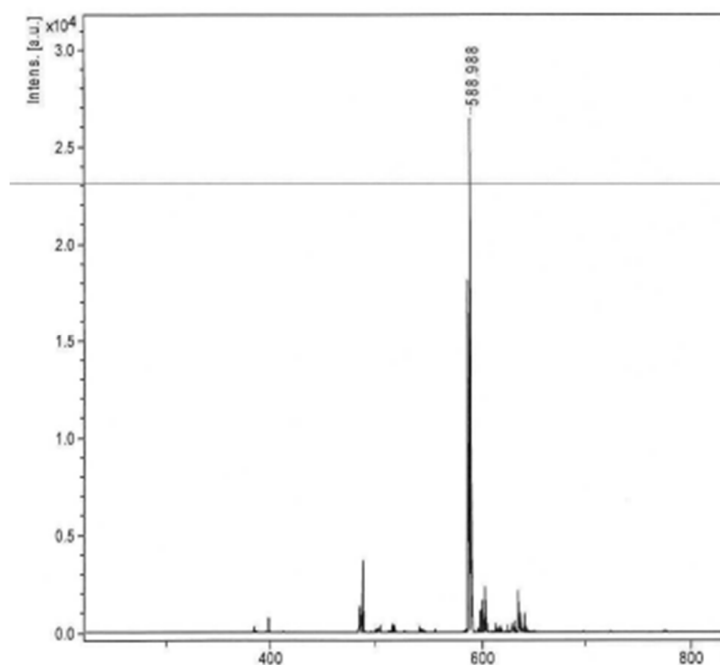

Figure S50. ESI-MS data for compound 12f.

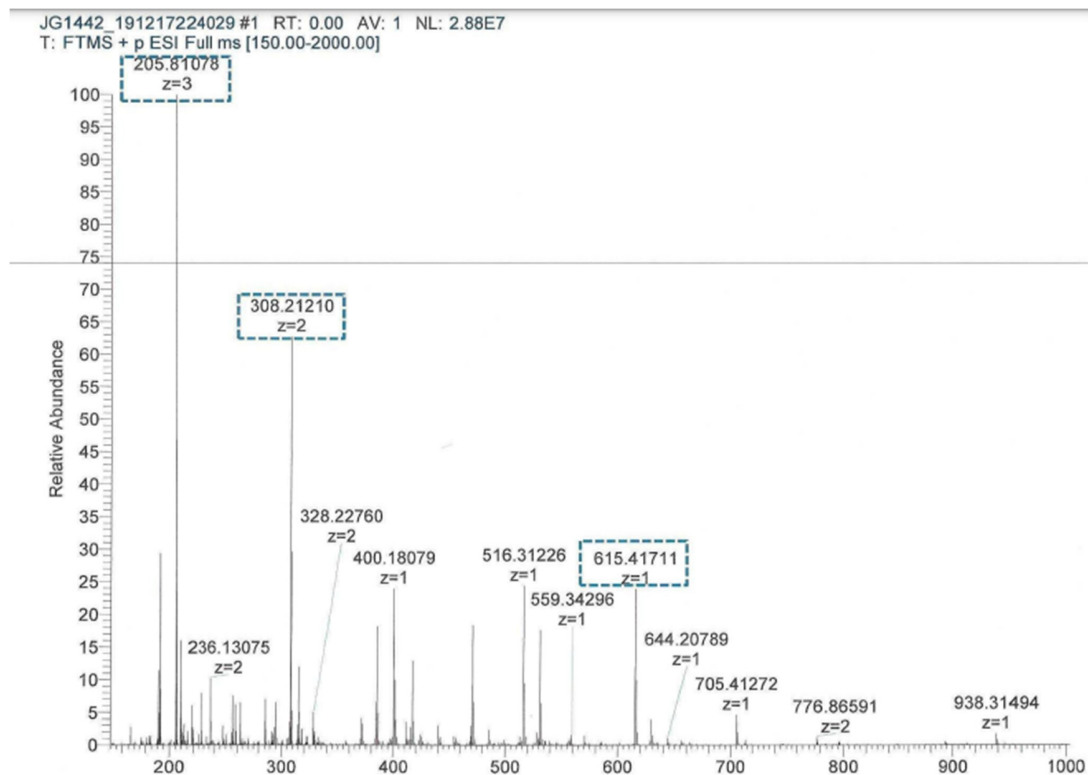

Figure S51. ESI-MS data for compound 12g.

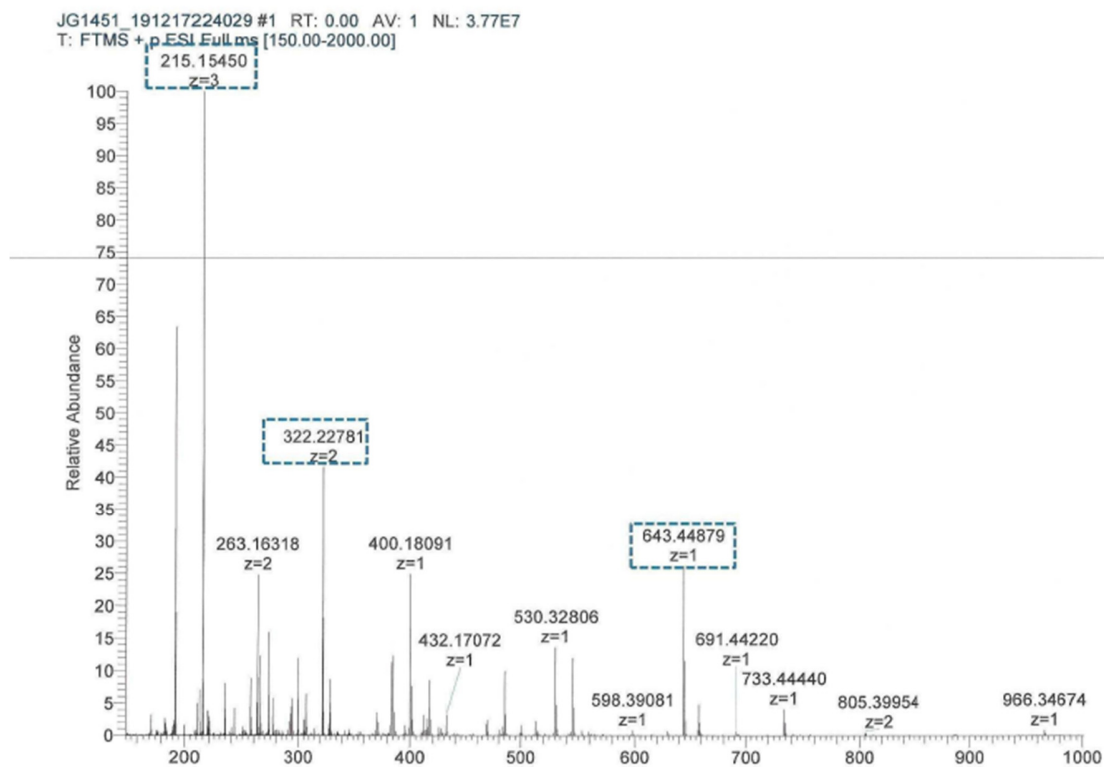

Figure S52. ESI-MS data for compound 12h.

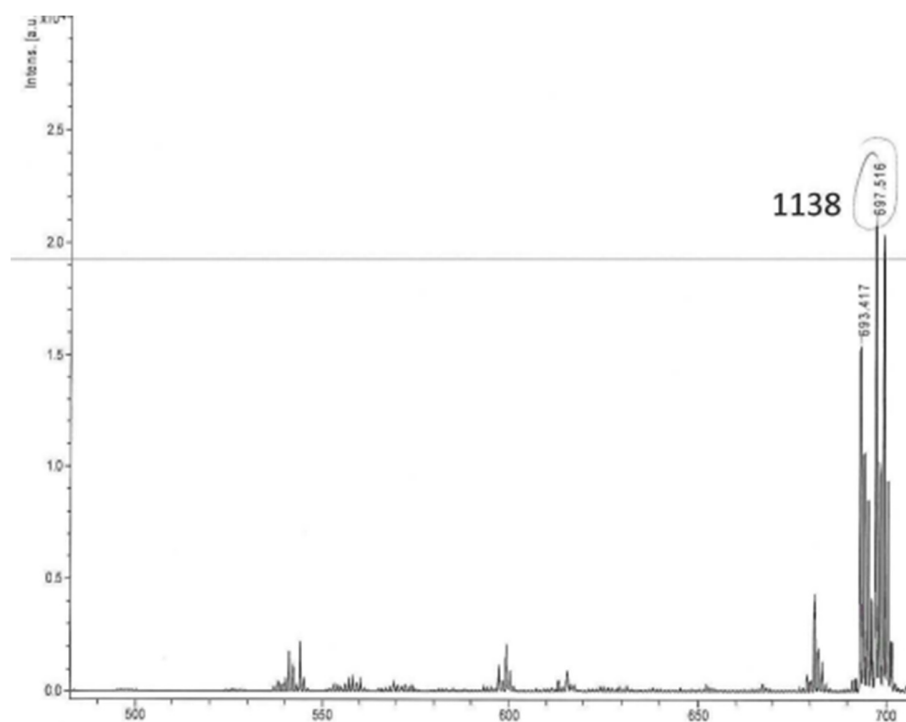

Figure S53. ESI-MS data for compound 12i.

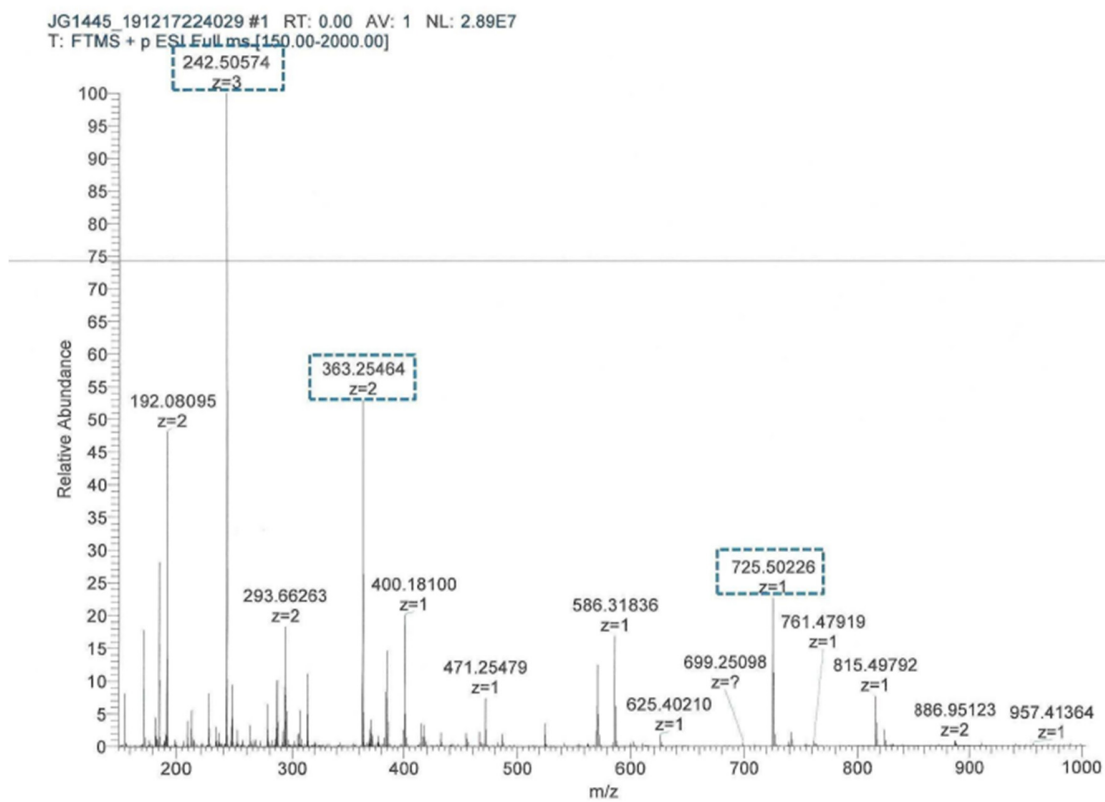

Figure S54. ESI-MS data for compound 12j.

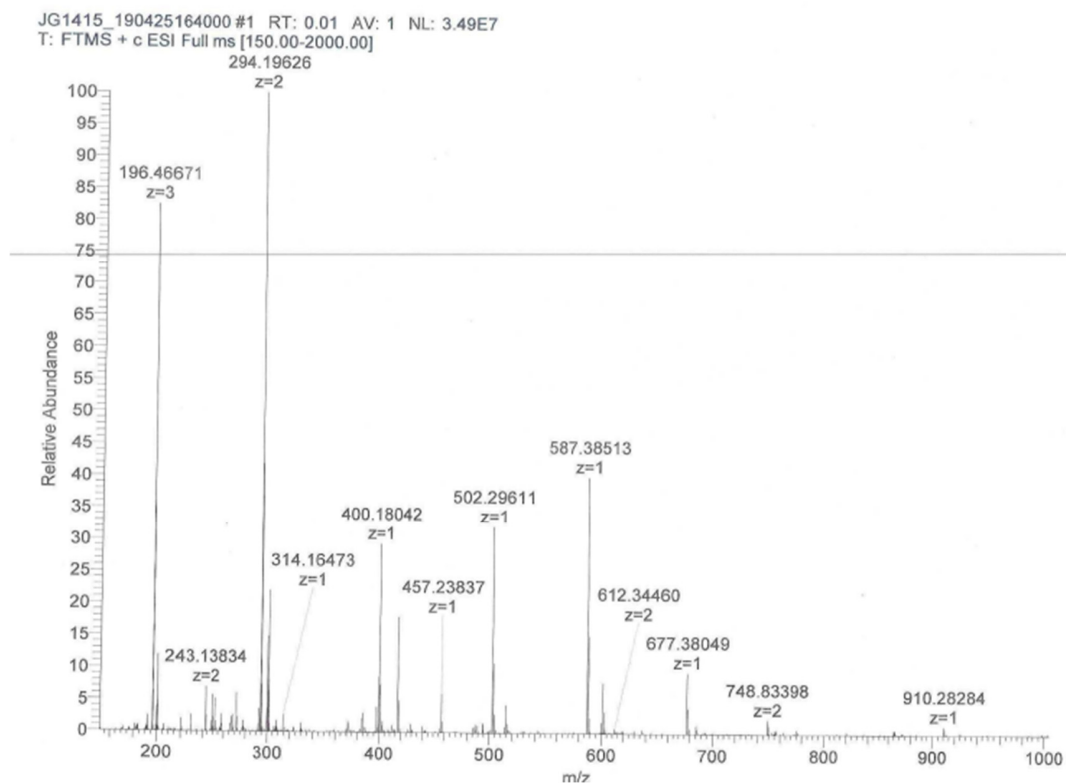

Figure S55. ESI-MS data for compound 12k.

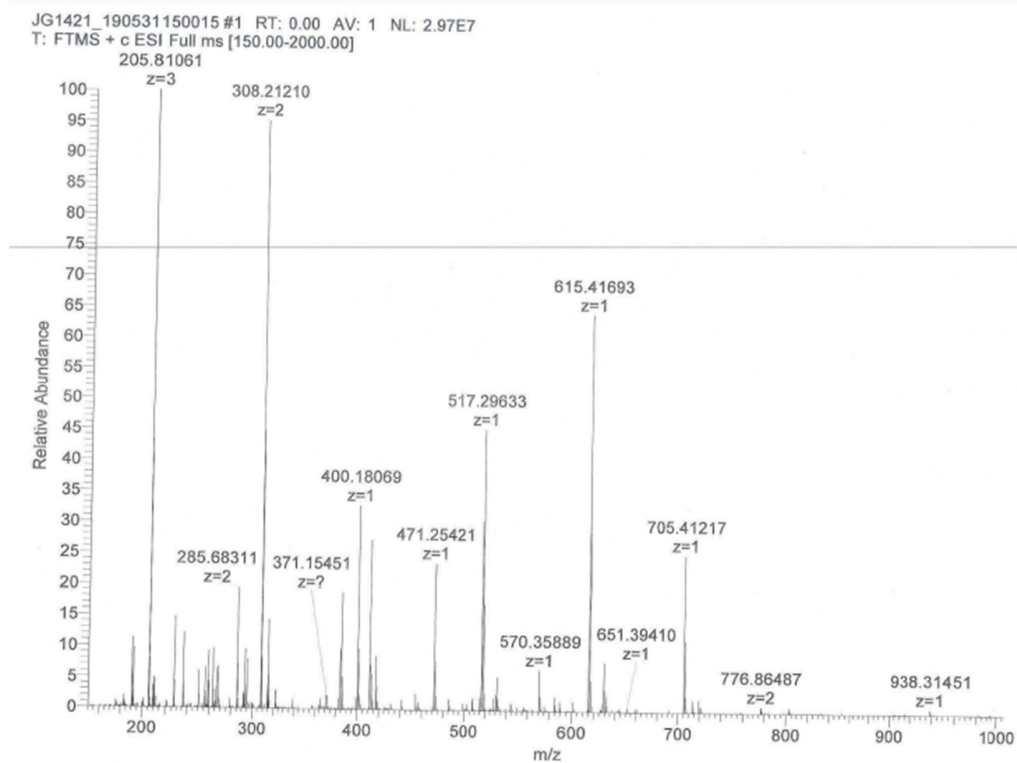

Figure S56. ESI-MS data for compound 12l.

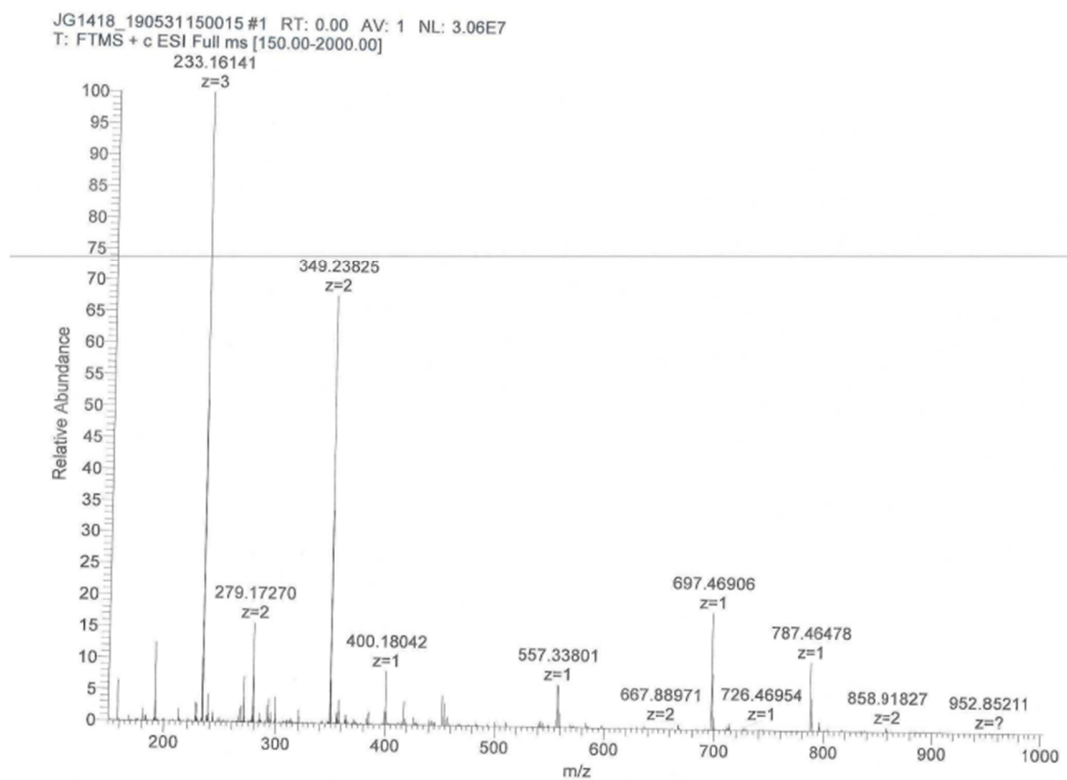

Figure S57. ESI-MS data for compound 12m.

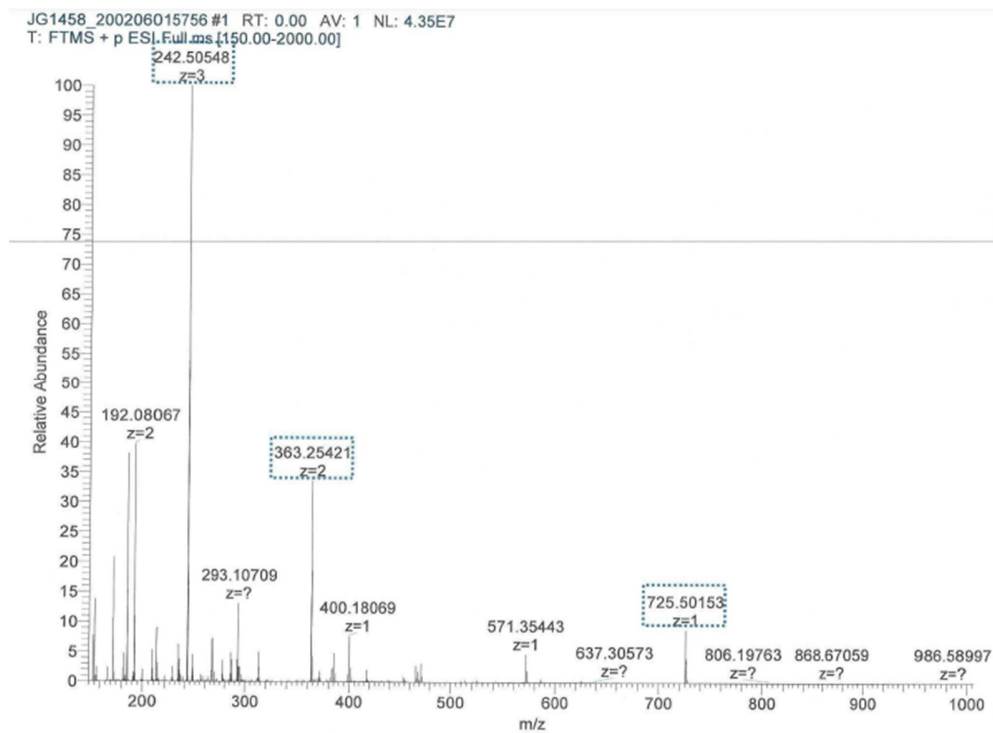

Figure S58. ESI-MS data for compound 12n.

JG 1257\_180503155352 #1 RT: 0.01 AV: 1 NL: 5.79E5  
T: FTMS + p ESI Full ms [150.00-800.00]

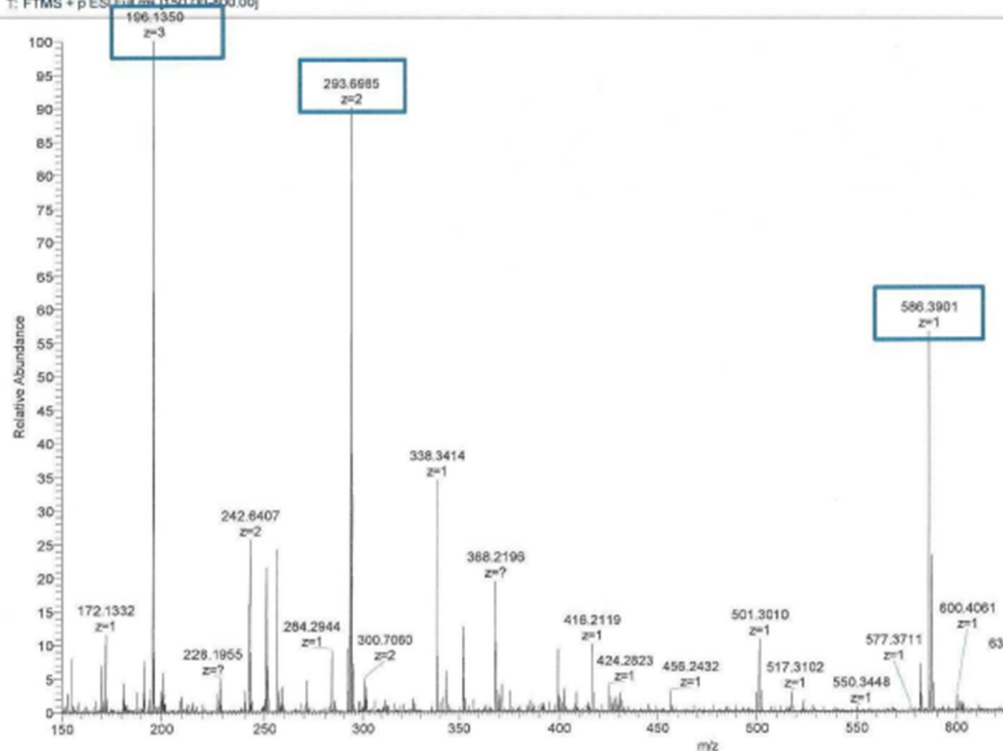

Figure S59. ESI-MS data for compound 13a.

JG1448\_191217224029 #1 RT: 0.01 AV: 1 NL: 3.40E7  
T: FTMS + p ESI Full ms [150.00-2000.00]

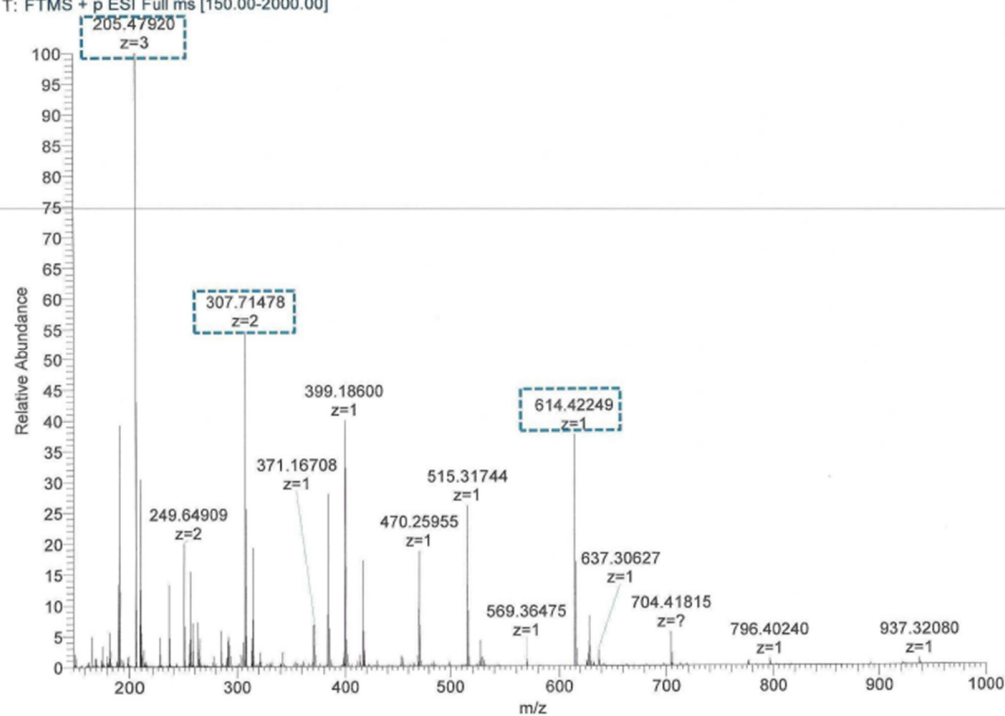

Figure S60. ESI-MS data for compound 13b.

JG1265\_180702115925 #2-41 RT: 0.02-0.56 AV: 40 NL: 1.28E7  
T: FTMS + p ESI Full ms [150.00-2000.00]

Ok z=

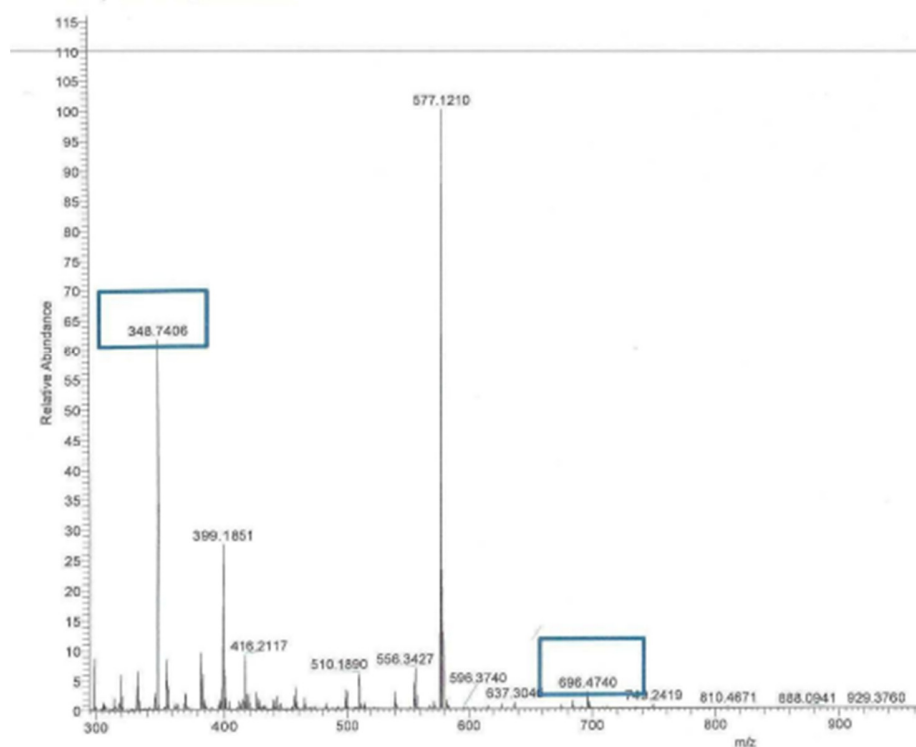

Figure S61. ESI-MS data for compound 13c.

JG1454\_200206015756 #1 RT: 0.00 AV: 1 NL: 2.13E7  
T: FTMS + p ESI Full ms [150.00-2000.00]

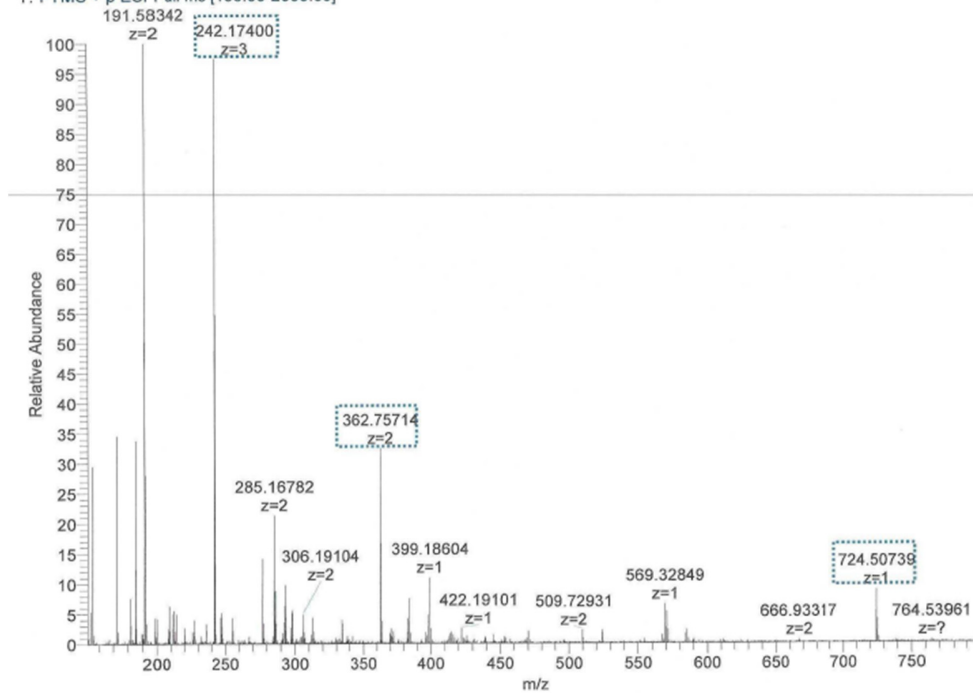

Figure S62. ESI-MS data for compound 13d.

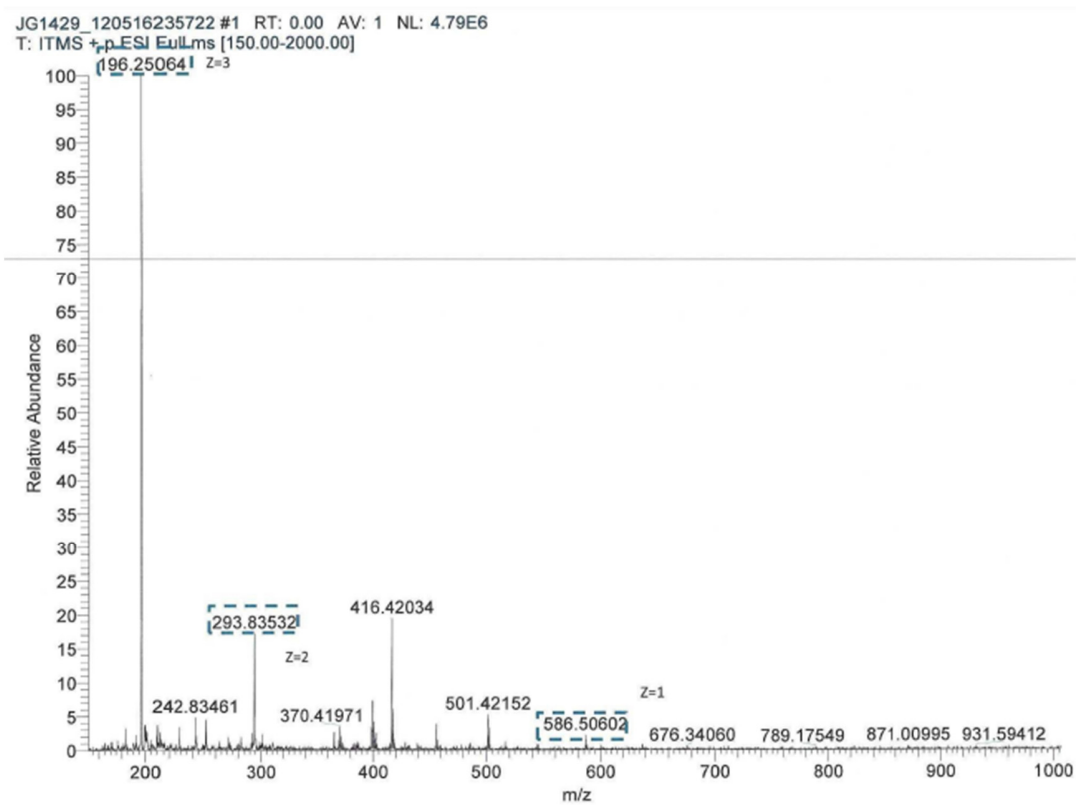

Figure S63. ESI-MS data for compound 13e.
